# Supplementary material for: The Platelet microRNA Profile of Kawasaki Disease: Identification of Novel Diagnostic Biomarkers
Source: Hindawi journal article supplement (doi:10.1155/2020/9061568), 2020-01-01
Supplement: f1 [file 9061568.f1.pdf]

**Supplementary Figures:**

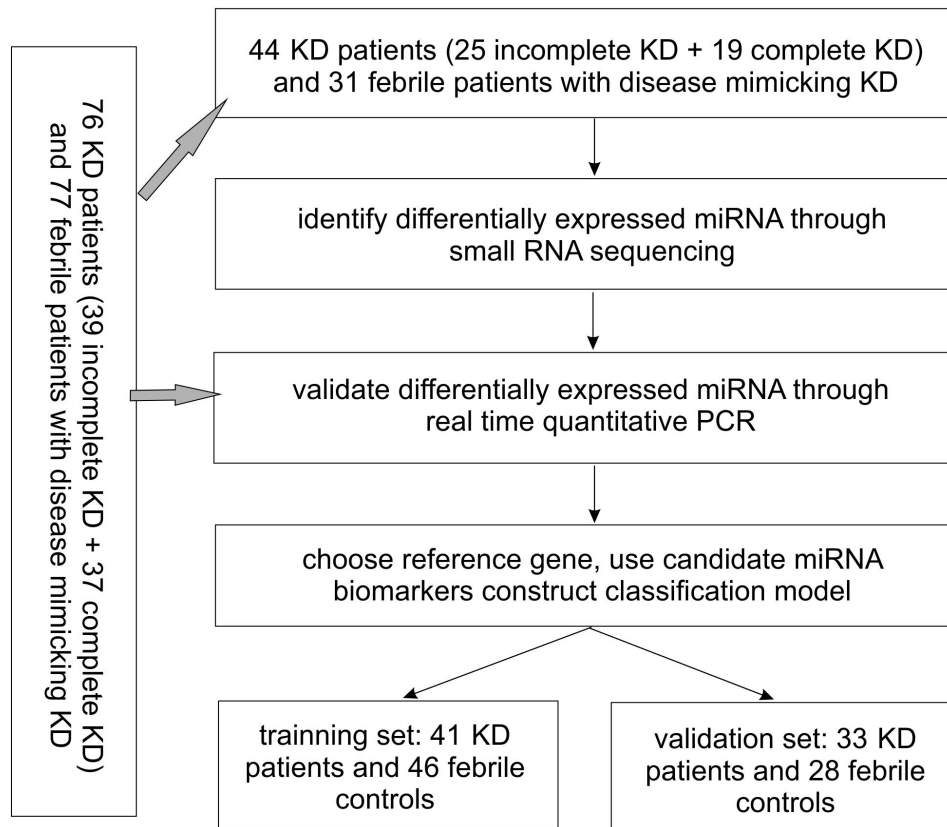

**Supplementary Figure 1:** Flowchart of overall study design. The majority of enrolled patients were included in miRNA validation stage and only previously enrolled 75 participants were in discovery stage.

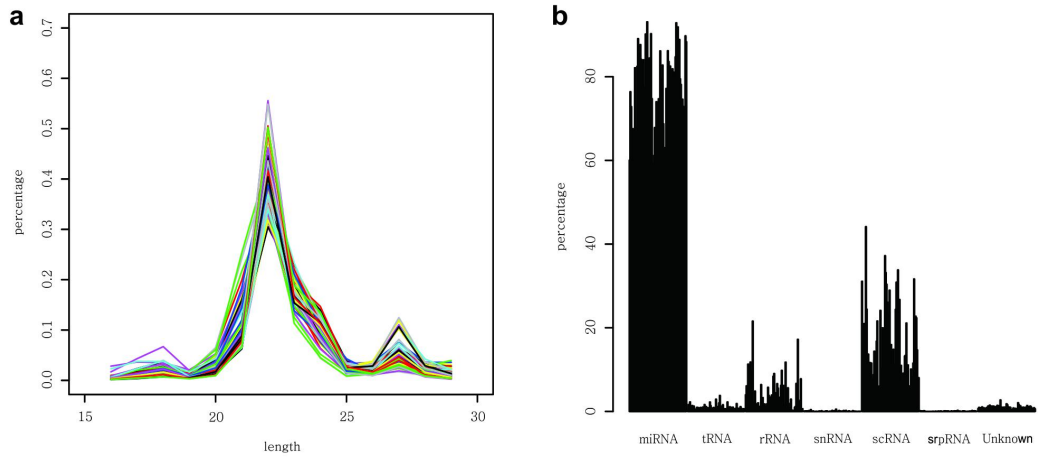

**Supplementary Figure 2:** Length distribution and RNA category of clean reads. (a) Length distribution of clean reads; (b) RNA category of mapped clean reads.

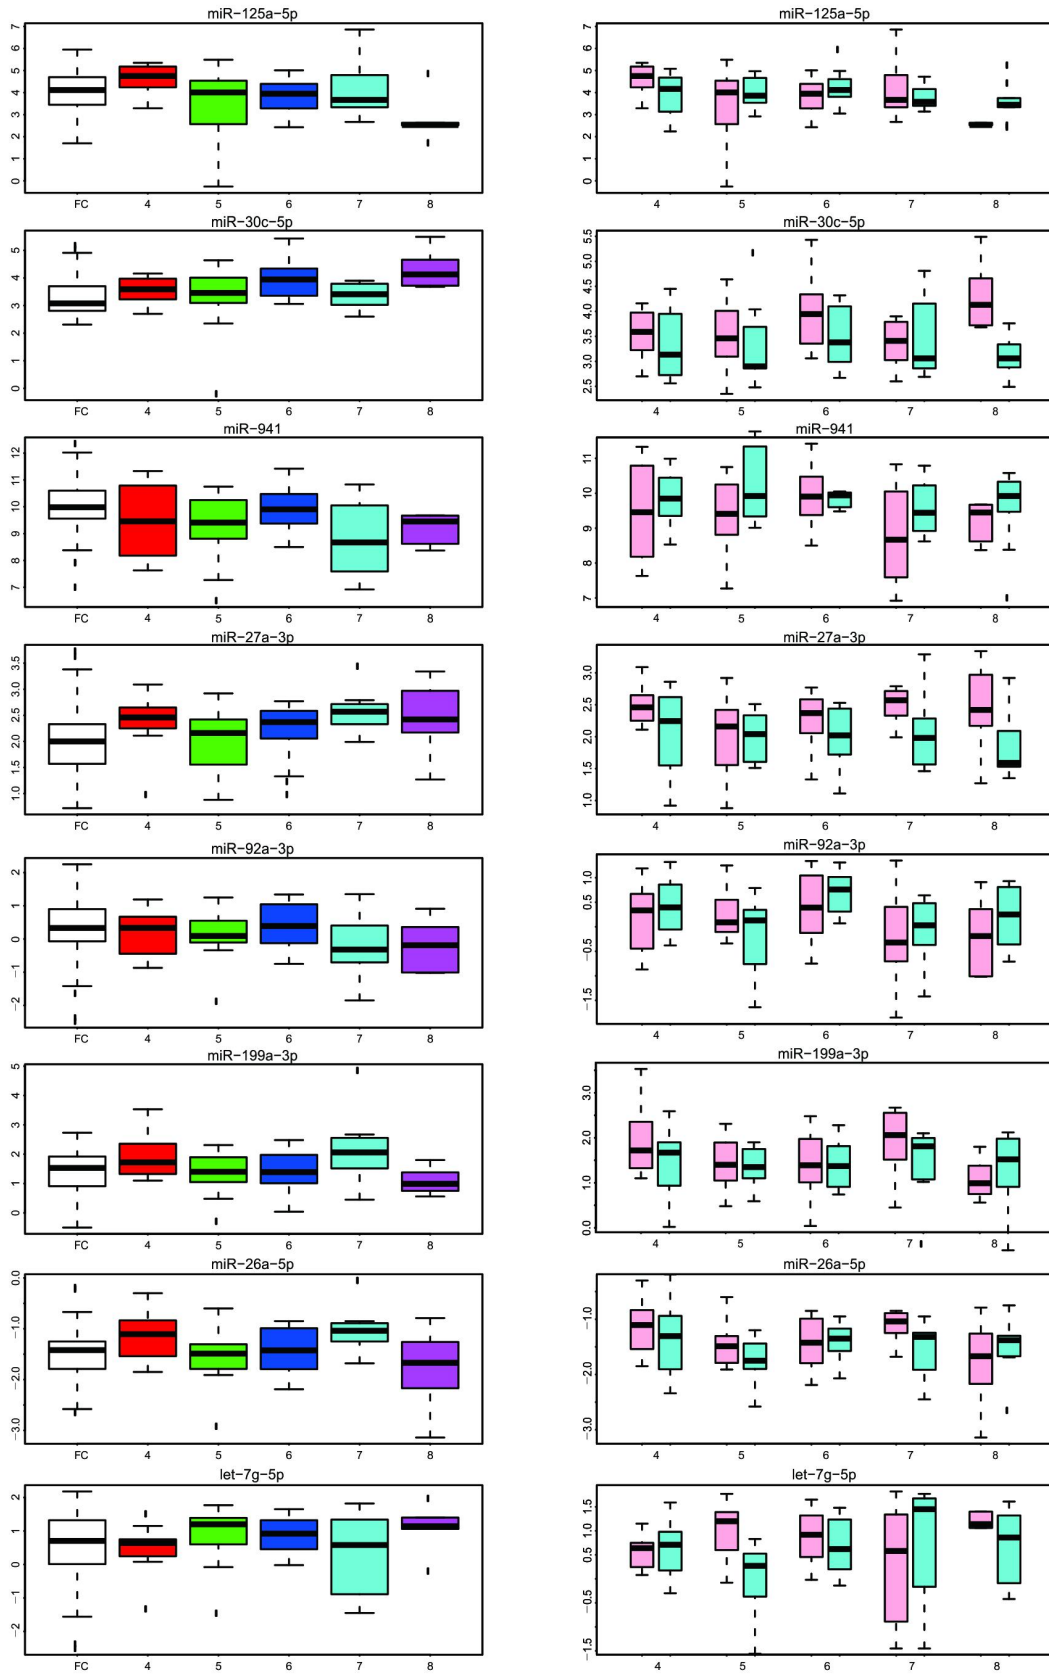

**Supplementary Figure 3:** Expression level changes of miRNAs with different fever duration. X axis: Fever duration days before sample collection, FC represents febrile control; Y axis: Delta value of miRNA qRT-PCR results.

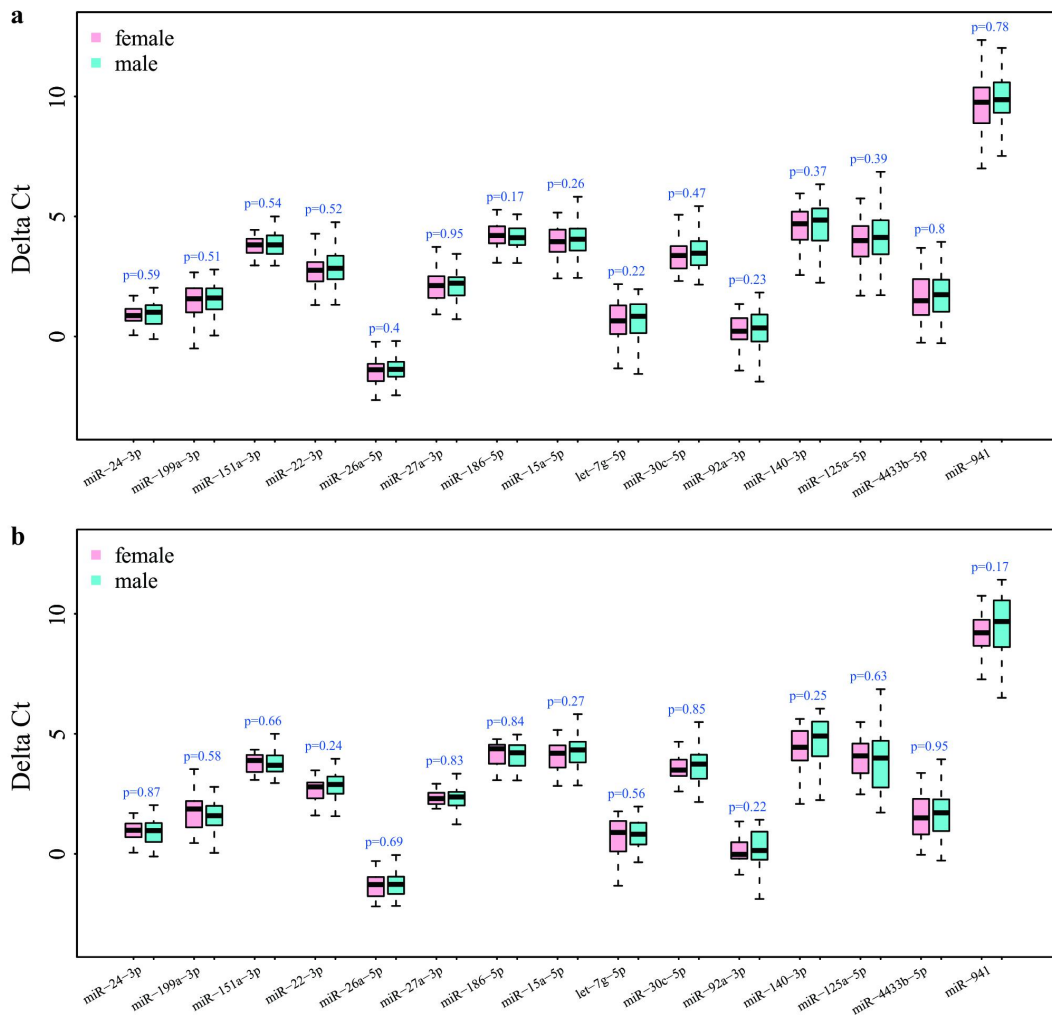

**Supplementary Figure 4:** miRNA expression level between different genders. Boxplot of miRNA expression levels of female and male in all patients (a) and KD patients (b). miRNA miR-126-3p was used as the reference gene. Statistical significance of miRNA expression between KD patients and febrile controls was calculated by Student's t test.

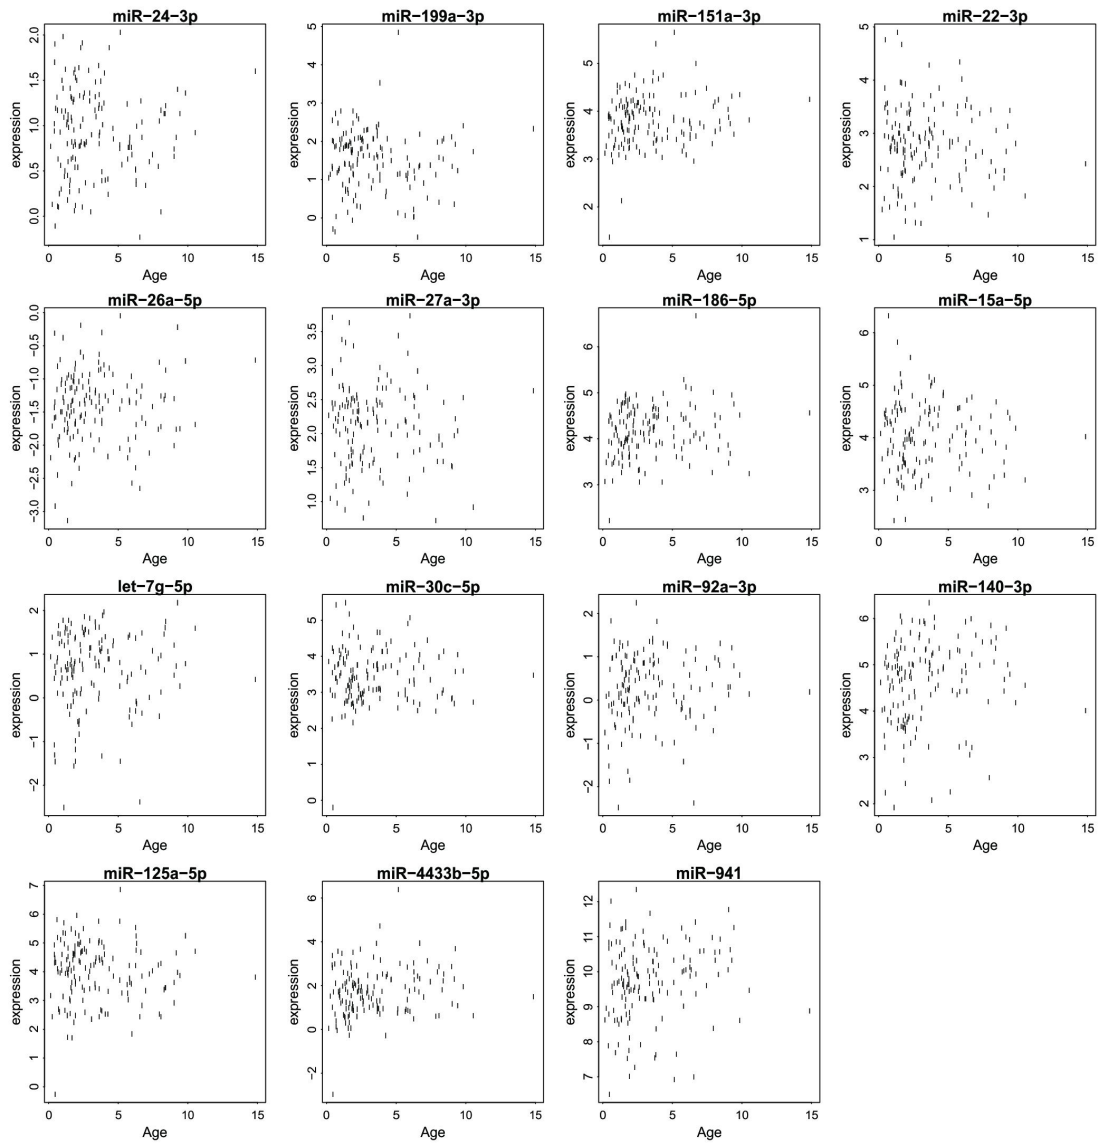

**Supplementary Figure 5:** miRNA expression level of patients with different age. X axis: Patient's age; Y axis: Delta value of miRNA qRT-PCR results. miR-126-3p was used as the reference gene.

## Supplementary Tables

**Supplementary Table 1:** The quantity and quality of total RNAs extracted by three different methods.

| RNA extraction kits | Samples              | 260/280          | 260/230 | Concentration<br>(ng/ul) | Total<br>(ng) |
|---------------------|----------------------|------------------|---------|--------------------------|---------------|
| mirVana miRNA       | Sample 1 (-80°C)     | 1.95             | 1.08    | 10.3                     | 1030          |
| Isolation Kit       | Sample 1 (RNAlater)  | 1.77             | 0.19    | 7.68                     | 768           |
|                     | Sample 3-1           | 2.03             | 1.56    | 18.5                     | 1665          |
|                     | Sample 3-2           | 1.98             | 1.17    | 19.6                     | 1764          |
|                     | PBMC                 | 2.04             | 2.18    | 310                      | 27900         |
|                     | MagMAX mirVana Total | Sample 2 (-80°C) | 2.13    | 0.13                     | 11.7          |
| RNA Isolation Kit   | Sample 2 (RNAlater)  | 2.12             | 0.07    | 7.8                      | 374.4         |
| Trizol Reagent kit  | Sample 1 (-80°C)     | 1.61             | 0.30    | 21                       | 735           |
|                     | Sample 1 (RNAlater)  | 1.65             | 0.32    | 15.6                     | 546           |
|                     | Sample 2 (-80°C)     | 1.60             | 0.22    | 11.4                     | 399           |
|                     | Sample 2 (RNAlater)  | 1.66             | 0.28    | 5.34                     | 186.9         |
|                     | Sample 3-1           | 1.76             | 0.22    | 27.8                     | 1390          |
|                     | Sample 3-2           | 1.74             | 0.16    | 25                       | 1250          |
|                     | PBMC                 | 1.96             | 1.32    | 640                      | 32000         |

**Supplementary Table 2:** The performances on qRT-PCR and construction of small RNA library of total RNAs extracted by two methods.

| RNA extraction kits         | Samples    | qRT-PCR   |                |             | Small RNA library |                          |
|-----------------------------|------------|-----------|----------------|-------------|-------------------|--------------------------|
|                             |            | RNU6B, Ct | miR-15a-5p, Ct | $\Delta$ Ct | Start (ng)        | Concentration of library |
| mirVana miRNA Isolation Kit | Sample 3-1 | 21.05     | 24.41          | 3.36        | 100               | 2.74                     |
|                             | Sample 3-2 | 21.07     | 24.48          | 3.41        | 100               | 2.66                     |
|                             | PBMC       | 20.35     | 27.61          | 7.26        |                   |                          |
| Trizol Reagent kit          | Sample 3-1 | 20.42     | 23.77          | 3.35        | 100               | 2.06                     |
|                             | Sample 3-2 | 20.99     | 20.41          | -0.58       | 100               | 1.85                     |
|                             | PBMC       | 20.43     | 27.24          | 6.81        |                   |                          |

**Supplementary Table 3:** The differential expressed miRNAs between KD patients and febrile controls.

| <b>Mature.ID</b> | <b>logFC</b> | <b>logCPM</b> | <b>LR</b> | <b>P-value</b> | <b>FDR</b> |
|------------------|--------------|---------------|-----------|----------------|------------|
| hsa-let-7a-3p    | -1.43401     | 5.17871       | 72.41898  | 1.74E-17       | 6.35E-15   |
| hsa-miR-151a-5p  | -3.61714     | 11.47903      | 62.67536  | 2.44E-15       | 4.45E-13   |
| hsa-miR-151b     | -3.62940     | 9.20253       | 56.25138  | 6.38E-14       | 7.76E-12   |
| hsa-miR-324-5p   | 2.09118      | 4.56804       | 52.38778  | 4.56E-13       | 4.16E-11   |
| hsa-miR-140-3p   | 1.48016      | 13.28647      | 51.11946  | 8.69E-13       | 6.34E-11   |
| hsa-miR-324-3p   | 1.89830      | 4.26510       | 50.57132  | 1.15E-12       | 6.99E-11   |
| hsa-miR-26a-5p   | -0.97214     | 16.31080      | 48.74537  | 2.91E-12       | 1.52E-10   |
| hsa-miR-652-3p   | 1.22000      | 9.85443       | 45.74106  | 1.35E-11       | 6.16E-10   |
| hsa-miR-532-5p   | 1.52506      | 9.74139       | 44.85405  | 2.12E-11       | 8.61E-10   |
| hsa-let-7e-5p    | -1.13430     | 9.78205       | 38.54694  | 5.35E-10       | 1.95E-08   |
| hsa-miR-340-3p   | -1.06895     | 7.09572       | 37.82149  | 7.75E-10       | 2.57E-08   |
| hsa-miR-374b-3p  | -1.19292     | 4.30347       | 37.37690  | 9.74E-10       | 2.85E-08   |
| hsa-miR-128-3p   | -0.93846     | 10.83545      | 37.29353  | 1.02E-09       | 2.85E-08   |
| hsa-miR-378d     | 1.35162      | 6.82198       | 35.60677  | 2.41E-09       | 6.29E-08   |
| hsa-miR-378c     | 1.28851      | 7.06385       | 35.24248  | 2.91E-09       | 7.08E-08   |
| hsa-miR-1-3p     | -1.31542     | 10.42915      | 34.37157  | 4.55E-09       | 1.04E-07   |
| hsa-miR-93-5p    | 1.03146      | 11.50382      | 34.24213  | 4.87E-09       | 1.04E-07   |
| hsa-miR-125a-5p  | -1.15282     | 10.23158      | 33.25248  | 8.09E-09       | 1.64E-07   |
| hsa-miR-93-3p    | 0.83225      | 3.98467       | 31.70523  | 1.79E-08       | 3.45E-07   |
| hsa-miR-532-3p   | 1.22614      | 3.91772       | 31.56554  | 1.93E-08       | 3.52E-07   |
| hsa-miR-941      | 1.19208      | 8.83131       | 30.81474  | 2.84E-08       | 4.63E-07   |
| hsa-miR-4659b-3p | -0.95647     | 3.48924       | 30.79772  | 2.86E-08       | 4.63E-07   |
| hsa-miR-503-5p   | 1.08106      | 6.45891       | 30.76140  | 2.92E-08       | 4.63E-07   |
| hsa-miR-96-5p    | 2.26963      | 4.64189       | 30.58273  | 3.20E-08       | 4.87E-07   |
| hsa-miR-1180-3p  | 1.79074      | 4.85688       | 30.36529  | 3.58E-08       | 5.08E-07   |
| hsa-miR-3158-3p  | 1.65899      | 5.99913       | 30.27701  | 3.75E-08       | 5.08E-07   |
| hsa-miR-3688-3p  | 1.72868      | 3.78896       | 30.27225  | 3.75E-08       | 5.08E-07   |
| hsa-miR-194-5p   | 1.90615      | 7.97544       | 30.15950  | 3.98E-08       | 5.19E-07   |
| hsa-miR-210-3p   | 1.00779      | 5.32697       | 29.84560  | 4.68E-08       | 5.87E-07   |
| hsa-miR-143-5p   | 1.17238      | 3.73794       | 29.78619  | 4.82E-08       | 5.87E-07   |
| hsa-miR-20b-5p   | 1.49050      | 8.14358       | 29.69068  | 5.07E-08       | 5.97E-07   |
| hsa-miR-1976     | 1.41561      | 3.23717       | 29.61724  | 5.26E-08       | 5.97E-07   |
| hsa-miR-4286     | 1.22021      | 4.40043       | 29.56805  | 5.40E-08       | 5.97E-07   |
| hsa-miR-345-5p   | 0.96679      | 4.54674       | 29.15351  | 6.69E-08       | 7.18E-07   |
| hsa-miR-145-5p   | 1.16462      | 6.36276       | 28.63306  | 8.75E-08       | 9.12E-07   |
| hsa-miR-27a-5p   | 1.67014      | 5.58388       | 27.84997  | 1.31E-07       | 1.33E-06   |
| hsa-miR-424-5p   | 1.67452      | 3.87607       | 27.50179  | 1.57E-07       | 1.51E-06   |
| hsa-miR-101-3p   | 1.52459      | 12.66057      | 27.48197  | 1.59E-07       | 1.51E-06   |
| hsa-miR-500a-3p  | 0.72169      | 7.65047       | 27.44568  | 1.62E-07       | 1.51E-06   |
| hsa-miR-28-5p    | -0.67944     | 7.81534       | 27.30174  | 1.74E-07       | 1.59E-06   |
| hsa-miR-369-3p   | -1.27620     | 5.66721       | 27.21131  | 1.82E-07       | 1.62E-06   |



---

|                  |          |          |          |          |          |
|------------------|----------|----------|----------|----------|----------|
| hsa-miR-378f     | 0.81849  | 3.48168  | 26.90414 | 2.14E-07 | 1.86E-06 |
| hsa-miR-106b-3p  | 1.18789  | 12.13162 | 26.70555 | 2.37E-07 | 2.01E-06 |
| hsa-miR-2277-5p  | 1.07688  | 2.94364  | 25.92882 | 3.54E-07 | 2.94E-06 |
| hsa-miR-130b-5p  | -1.02477 | 8.87147  | 25.82283 | 3.74E-07 | 3.04E-06 |
| hsa-miR-769-5p   | 0.71633  | 7.70723  | 25.68915 | 4.01E-07 | 3.18E-06 |
| hsa-miR-98-5p    | -0.57424 | 10.22848 | 25.64930 | 4.09E-07 | 3.18E-06 |
| hsa-miR-25-3p    | 1.17401  | 13.41081 | 25.57960 | 4.25E-07 | 3.23E-06 |
| hsa-miR-21-3p    | 1.12129  | 4.49155  | 25.21174 | 5.14E-07 | 3.83E-06 |
| hsa-miR-132-3p   | 0.87742  | 3.25385  | 25.10523 | 5.43E-07 | 3.96E-06 |
| hsa-miR-331-3p   | 0.91465  | 5.33143  | 24.55215 | 7.23E-07 | 5.18E-06 |
| hsa-miR-491-5p   | 0.86181  | 3.16622  | 23.91847 | 1.01E-06 | 7.05E-06 |
| hsa-miR-486-5p   | 1.26585  | 15.65835 | 23.83230 | 1.05E-06 | 7.24E-06 |
| hsa-miR-15a-5p   | 1.58354  | 6.82681  | 23.66698 | 1.15E-06 | 7.74E-06 |
| hsa-miR-326      | 1.26021  | 5.12760  | 23.62823 | 1.17E-06 | 7.76E-06 |
| hsa-miR-144-3p   | 1.88699  | 6.99223  | 23.47441 | 1.27E-06 | 8.25E-06 |
| hsa-miR-16-5p    | 1.28419  | 10.86116 | 23.10640 | 1.53E-06 | 9.82E-06 |
| hsa-let-7d-5p    | -0.67535 | 11.46457 | 22.88155 | 1.72E-06 | 1.08E-05 |
| hsa-miR-378g     | 0.69323  | 2.62825  | 22.56397 | 2.03E-06 | 1.26E-05 |
| hsa-miR-199b-5p  | 1.15412  | 5.72772  | 22.17264 | 2.49E-06 | 1.52E-05 |
| hsa-miR-143-3p   | 0.95171  | 11.81482 | 22.01910 | 2.70E-06 | 1.62E-05 |
| hsa-miR-193a-5p  | 1.20159  | 3.52178  | 21.83129 | 2.98E-06 | 1.70E-05 |
| hsa-miR-660-5p   | 1.49035  | 5.48222  | 21.81881 | 3.00E-06 | 1.70E-05 |
| hsa-miR-199a-3p  | -0.71361 | 12.97945 | 21.80383 | 3.02E-06 | 1.70E-05 |
| hsa-miR-199b-3p  | -0.71360 | 12.97939 | 21.80328 | 3.02E-06 | 1.70E-05 |
| hsa-miR-505-5p   | -1.00197 | 3.28569  | 21.73873 | 3.12E-06 | 1.73E-05 |
| hsa-miR-4746-5p  | 0.68825  | 3.38468  | 21.29656 | 3.93E-06 | 2.14E-05 |
| hsa-miR-192-5p   | 1.29635  | 10.28051 | 21.14837 | 4.25E-06 | 2.25E-05 |
| hsa-miR-22-5p    | -0.58421 | 5.18918  | 21.14347 | 4.26E-06 | 2.25E-05 |
| hsa-miR-7976     | 1.27673  | 3.69124  | 20.75728 | 5.21E-06 | 2.72E-05 |
| hsa-miR-543      | -1.27574 | 8.10665  | 20.70179 | 5.37E-06 | 2.76E-05 |
| hsa-let-7d-3p    | -0.56112 | 9.48558  | 20.35984 | 6.42E-06 | 3.25E-05 |
| hsa-miR-221-3p   | -0.62205 | 13.59690 | 20.20673 | 6.95E-06 | 3.48E-05 |
| hsa-miR-493-5p   | -0.95954 | 9.95540  | 20.13239 | 7.23E-06 | 3.56E-05 |
| hsa-miR-19b-3p   | 0.96311  | 6.11385  | 20.06369 | 7.49E-06 | 3.65E-05 |
| hsa-miR-106b-5p  | 1.30179  | 6.78897  | 19.93836 | 8.00E-06 | 3.84E-05 |
| hsa-miR-425-3p   | 0.68902  | 6.53550  | 19.76491 | 8.76E-06 | 4.15E-05 |
| hsa-miR-502-3p   | 0.83105  | 5.88633  | 19.53276 | 9.89E-06 | 4.63E-05 |
| hsa-miR-183-5p   | 1.54150  | 9.64222  | 19.05965 | 1.27E-05 | 5.85E-05 |
| hsa-miR-106a-5p  | 1.01153  | 7.65518  | 18.70774 | 1.52E-05 | 6.95E-05 |
| hsa-miR-378a-3p  | 0.51950  | 10.59326 | 18.49641 | 1.70E-05 | 7.67E-05 |
| hsa-miR-144-5p   | 1.77464  | 9.15316  | 18.00931 | 2.20E-05 | 9.79E-05 |
| hsa-miR-17-5p    | 0.72593  | 11.35805 | 17.84108 | 2.40E-05 | 0.000106 |
| hsa-miR-1226-3p  | -0.81786 | 3.43165  | 17.81046 | 2.44E-05 | 0.000106 |
| hsa-miR-548am-3p | -0.63947 | 3.52261  | 17.54365 | 2.81E-05 | 0.000121 |

---

---

|                  |          |          |          |          |          |
|------------------|----------|----------|----------|----------|----------|
| hsa-miR-548o-3p  | -0.46467 | 4.99102  | 17.22718 | 3.32E-05 | 0.000141 |
| hsa-miR-215-5p   | 1.12254  | 4.51790  | 16.95057 | 3.84E-05 | 0.000161 |
| hsa-miR-451a     | 1.43875  | 14.43618 | 16.76510 | 4.23E-05 | 0.000175 |
| hsa-miR-1307-3p  | 0.97104  | 10.03077 | 16.18469 | 5.75E-05 | 0.000236 |
| hsa-miR-1301-3p  | -0.87192 | 8.97696  | 15.91338 | 6.63E-05 | 0.000269 |
| hsa-miR-605-3p   | -0.78721 | 2.67875  | 15.85512 | 6.84E-05 | 0.000274 |
| hsa-miR-589-5p   | 0.60637  | 6.33468  | 15.76919 | 7.16E-05 | 0.000284 |
| hsa-miR-3913-5p  | 1.03479  | 3.59617  | 15.34661 | 8.95E-05 | 0.000351 |
| hsa-miR-30b-5p   | 0.74572  | 8.41505  | 15.09048 | 0.000102 | 0.000394 |
| hsa-miR-3173-5p  | -0.68255 | 4.07322  | 15.08986 | 0.000103 | 0.000394 |
| hsa-miR-629-5p   | 0.65496  | 9.40612  | 15.04025 | 0.000105 | 0.0004   |
| hsa-miR-200b-3p  | -0.46474 | 6.14944  | 15.02065 | 0.000106 | 0.0004   |
| hsa-miR-542-3p   | 0.92981  | 6.17357  | 14.98682 | 0.000108 | 0.000403 |
| hsa-miR-146b-3p  | 0.50729  | 6.11916  | 14.95909 | 0.00011  | 0.000405 |
| hsa-miR-877-5p   | 0.70206  | 5.06653  | 14.82597 | 0.000118 | 0.00043  |
| hsa-miR-4732-3p  | 1.26831  | 4.03478  | 14.80867 | 0.000119 | 0.00043  |
| hsa-miR-874-3p   | 0.94566  | 2.36228  | 14.76470 | 0.000122 | 0.000436 |
| hsa-miR-20a-5p   | 0.79496  | 12.33687 | 14.30709 | 0.000155 | 0.00055  |
| hsa-miR-628-5p   | -0.54967 | 3.16762  | 14.27225 | 0.000158 | 0.000555 |
| hsa-miR-30b-3p   | -0.63575 | 3.56875  | 14.21049 | 0.000163 | 0.000567 |
| hsa-miR-182-5p   | 1.07428  | 11.49730 | 14.19737 | 0.000165 | 0.000567 |
| hsa-miR-363-3p   | 0.99020  | 8.90555  | 14.14640 | 0.000169 | 0.000573 |
| hsa-miR-185-3p   | 0.50999  | 8.65624  | 14.14049 | 0.00017  | 0.000573 |
| hsa-miR-5193     | -0.54375 | 4.15758  | 13.97243 | 0.000186 | 0.000621 |
| hsa-miR-548j-5p  | -0.54022 | 5.45991  | 13.84521 | 0.000199 | 0.000659 |
| hsa-miR-128-1-5p | 0.54135  | 2.96337  | 13.77184 | 0.000206 | 0.000679 |
| hsa-miR-378i     | 0.49153  | 7.93732  | 13.75171 | 0.000209 | 0.00068  |
| hsa-let-7f-1-3p  | -0.52121 | 2.47503  | 13.37965 | 0.000254 | 0.000822 |
| hsa-miR-18a-5p   | 0.75014  | 4.66342  | 13.34616 | 0.000259 | 0.000829 |
| hsa-miR-223-3p   | 0.68506  | 11.15812 | 13.08177 | 0.000298 | 0.000946 |
| hsa-miR-6130     | 0.77270  | 3.94664  | 12.38794 | 0.000432 | 0.00136  |
| hsa-miR-548ad-5p | 1.04307  | 3.50567  | 12.26536 | 0.000461 | 0.00144  |
| hsa-miR-485-3p   | -0.82647 | 7.13044  | 12.18463 | 0.000482 | 0.00149  |
| hsa-miR-330-3p   | -0.66699 | 9.03691  | 11.93417 | 0.000551 | 0.001686 |
| hsa-miR-15b-5p   | 0.83916  | 8.51662  | 11.92358 | 0.000554 | 0.001686 |
| hsa-miR-335-3p   | -0.58667 | 8.59194  | 11.88655 | 0.000565 | 0.001706 |
| hsa-miR-181a-5p  | 0.69801  | 9.83679  | 11.86040 | 0.000573 | 0.001716 |
| hsa-miR-671-3p   | -0.82746 | 8.47491  | 11.72259 | 0.000617 | 0.001832 |
| hsa-miR-30a-5p   | 0.60444  | 9.80417  | 11.49970 | 0.000696 | 0.002049 |
| hsa-miR-181d-5p  | -0.42646 | 6.86408  | 11.38473 | 0.000741 | 0.002162 |
| hsa-miR-99b-3p   | -0.63607 | 6.16946  | 11.12453 | 0.000852 | 0.002468 |
| hsa-miR-1294     | 0.65125  | 3.40085  | 11.02527 | 0.000899 | 0.002583 |
| hsa-miR-200c-3p  | -0.46902 | 7.93626  | 10.89164 | 0.000966 | 0.002755 |
| hsa-miR-450b-5p  | 0.71164  | 5.18857  | 10.87262 | 0.000976 | 0.002761 |

---

---

|                  |          |          |          |          |          |
|------------------|----------|----------|----------|----------|----------|
| hsa-miR-130a-3p  | 0.52402  | 5.88483  | 10.60080 | 0.00113  | 0.003174 |
| hsa-miR-191-5p   | -0.36444 | 14.26634 | 10.54709 | 0.001164 | 0.003222 |
| hsa-miR-23b-5p   | -0.67003 | 3.96518  | 10.54443 | 0.001165 | 0.003222 |
| hsa-miR-148a-3p  | -0.41634 | 14.81262 | 10.50985 | 0.001187 | 0.003259 |
| hsa-miR-186-5p   | 0.76171  | 9.31916  | 10.46451 | 0.001217 | 0.003315 |
| hsa-miR-454-5p   | -0.44150 | 4.87704  | 10.44116 | 0.001232 | 0.003332 |
| hsa-miR-431-3p   | 0.81447  | 3.48768  | 10.36500 | 0.001284 | 0.003447 |
| hsa-miR-548ap-5p | -0.50706 | 2.70341  | 10.34861 | 0.001296 | 0.003452 |
| hsa-miR-628-3p   | -0.38005 | 4.66716  | 10.25719 | 0.001362 | 0.003601 |
| hsa-miR-652-5p   | 0.68297  | 3.82451  | 10.09262 | 0.001489 | 0.003877 |
| hsa-miR-339-3p   | 0.44645  | 5.45420  | 10.08158 | 0.001498 | 0.003877 |
| hsa-miR-127-5p   | 0.73234  | 5.42455  | 10.08134 | 0.001498 | 0.003877 |
| hsa-miR-99b-5p   | -0.56366 | 11.18673 | 9.95263  | 0.001606 | 0.004129 |
| hsa-miR-1827     | 0.74941  | 3.48891  | 9.87254  | 0.001678 | 0.004282 |
| hsa-miR-22-3p    | 0.48174  | 9.82633  | 9.64802  | 0.001896 | 0.004805 |
| hsa-miR-664a-5p  | -0.59899 | 5.67309  | 9.62436  | 0.00192  | 0.004833 |
| hsa-miR-191-3p   | -0.48143 | 3.36036  | 9.58113  | 0.001966 | 0.004915 |
| hsa-miR-501-3p   | 0.43646  | 7.66639  | 9.42610  | 0.002139 | 0.005312 |
| hsa-miR-130b-3p  | 0.43469  | 4.96381  | 9.30650  | 0.002283 | 0.005631 |
| hsa-miR-4665-5p  | 0.91503  | 3.04694  | 9.26152  | 0.00234  | 0.005733 |
| hsa-miR-92a-3p   | 0.56487  | 15.53407 | 9.22586  | 0.002386 | 0.005772 |
| hsa-miR-155-5p   | -0.37412 | 8.67177  | 9.22467  | 0.002388 | 0.005772 |
| hsa-miR-548ag    | -0.42143 | 3.90609  | 9.15679  | 0.002478 | 0.00595  |
| hsa-miR-181c-3p  | 0.50368  | 3.69153  | 9.13986  | 0.002501 | 0.005966 |
| hsa-miR-411-3p   | -0.62870 | 4.37926  | 9.11525  | 0.002535 | 0.005993 |
| hsa-miR-10a-5p   | -0.40506 | 9.93839  | 9.10789  | 0.002545 | 0.005993 |
| hsa-miR-185-5p   | -0.47539 | 13.02466 | 8.97917  | 0.002731 | 0.006357 |
| hsa-miR-7848-3p  | -0.68719 | 2.87349  | 8.97688  | 0.002734 | 0.006357 |
| hsa-miR-6741-3p  | -0.77213 | 2.81285  | 8.93370  | 0.0028   | 0.006467 |
| hsa-miR-4433b-3p | 0.86444  | 6.87733  | 8.72194  | 0.003144 | 0.007217 |
| hsa-miR-26b-5p   | -0.41356 | 13.19472 | 8.66921  | 0.003236 | 0.007383 |
| hsa-miR-140-5p   | 0.48528  | 6.07561  | 8.59650  | 0.003368 | 0.007636 |
| hsa-miR-1296-5p  | 0.47922  | 2.62362  | 8.58304  | 0.003393 | 0.007645 |
| hsa-miR-320a     | -0.61427 | 12.29972 | 8.38377  | 0.003786 | 0.008478 |
| hsa-miR-382-3p   | -0.56720 | 6.47120  | 8.37070  | 0.003813 | 0.008487 |
| hsa-miR-29b-3p   | 0.83589  | 4.67407  | 7.97959  | 0.004731 | 0.010465 |
| hsa-miR-6842-3p  | 0.45202  | 5.00544  | 7.94013  | 0.004835 | 0.010631 |
| hsa-miR-4433b-5p | -0.67584 | 11.01829 | 7.72737  | 0.005439 | 0.011888 |
| hsa-miR-107      | 0.49688  | 10.77487 | 7.63120  | 0.005737 | 0.012438 |
| hsa-miR-539-5p   | -0.83519 | 4.55944  | 7.62428  | 0.005759 | 0.012438 |
| hsa-miR-148b-5p  | 0.55224  | 4.14870  | 7.43958  | 0.00638  | 0.013699 |
| hsa-miR-3909     | 0.53995  | 2.95637  | 7.36005  | 0.006669 | 0.014235 |
| hsa-miR-425-5p   | 0.35687  | 9.20152  | 7.28576  | 0.00695  | 0.014749 |
| hsa-let-7a-5p    | -0.37928 | 14.88236 | 7.25856  | 0.007056 | 0.014888 |

---

|                   |          |          |         |          |          |
|-------------------|----------|----------|---------|----------|----------|
| hsa-miR-7706      | 0.70376  | 3.10771  | 7.23791 | 0.007138 | 0.014973 |
| hsa-miR-329-3p    | -0.55608 | 5.82906  | 7.19775 | 0.0073   | 0.015225 |
| hsa-miR-2355-3p   | -0.37557 | 4.14666  | 7.10907 | 0.007669 | 0.015905 |
| hsa-miR-146a-5p   | -0.33665 | 13.73447 | 6.87233 | 0.008754 | 0.018052 |
| hsa-miR-331-5p    | 0.40485  | 3.92156  | 6.83322 | 0.008948 | 0.018348 |
| hsa-miR-3120-3p   | -0.48073 | 5.64394  | 6.73454 | 0.009456 | 0.019282 |
| hsa-miR-576-5p    | 0.57975  | 4.37632  | 6.70221 | 0.009629 | 0.019526 |
| hsa-miR-30c-5p    | -0.28737 | 11.65347 | 6.68575 | 0.009719 | 0.019598 |
| hsa-miR-30e-3p    | 0.33955  | 10.76819 | 6.65264 | 0.009901 | 0.019856 |
| hsa-miR-3615      | 0.41175  | 8.48024  | 6.51077 | 0.010722 | 0.021386 |
| hsa-miR-505-3p    | -0.30157 | 6.88908  | 6.48555 | 0.010876 | 0.021574 |
| hsa-miR-335-5p    | -0.37672 | 7.45372  | 6.35297 | 0.011718 | 0.02312  |
| hsa-miR-548ay-5p  | 0.47482  | 4.23031  | 6.33853 | 0.011814 | 0.023184 |
| hsa-miR-1229-3p   | -0.48586 | 2.62405  | 6.20884 | 0.012711 | 0.024811 |
| hsa-miR-23a-3p    | 0.35536  | 11.66634 | 6.14775 | 0.013158 | 0.025546 |
| hsa-miR-766-3p    | 0.42813  | 6.89756  | 6.05940 | 0.013832 | 0.026713 |
| hsa-miR-495-3p    | -0.56312 | 6.44687  | 5.96649 | 0.01458  | 0.027994 |
| hsa-miR-100-5p    | 0.91548  | 6.23395  | 5.95823 | 0.014649 | 0.027994 |
| hsa-let-7b-3p     | -0.35490 | 3.37794  | 5.88069 | 0.015308 | 0.029101 |
| hsa-miR-3120-5p   | -0.52570 | 2.86826  | 5.81531 | 0.015887 | 0.030046 |
| hsa-miR-641       | -0.59562 | 4.94605  | 5.75888 | 0.016406 | 0.030866 |
| hsa-miR-320b      | -0.49108 | 8.79993  | 5.50711 | 0.018939 | 0.035451 |
| hsa-miR-337-3p    | -0.57723 | 3.27227  | 5.48615 | 0.019168 | 0.035695 |
| hsa-miR-338-5p    | -0.30940 | 5.56227  | 5.39213 | 0.020228 | 0.037478 |
| hsa-let-7c-5p     | 0.46315  | 11.06004 | 5.35465 | 0.020667 | 0.037993 |
| hsa-miR-651-5p    | 0.44038  | 4.71171  | 5.35068 | 0.020714 | 0.037993 |
| hsa-miR-379-3p    | -0.47516 | 4.00868  | 5.32883 | 0.020976 | 0.03828  |
| hsa-miR-151a-3p   | -0.33805 | 14.27794 | 5.28277 | 0.021537 | 0.03911  |
| hsa-miR-1185-2-3p | -0.48783 | 3.63268  | 5.23111 | 0.022186 | 0.040089 |
| hsa-miR-150-5p    | 0.89523  | 10.12868 | 5.22125 | 0.022313 | 0.040119 |
| hsa-miR-590-3p    | -0.45273 | 2.79935  | 5.07136 | 0.024324 | 0.043521 |
| hsa-miR-150-3p    | 0.75136  | 3.23041  | 5.05577 | 0.024544 | 0.0437   |
| hsa-miR-5010-3p   | 0.38055  | 4.82947  | 5.03596 | 0.024826 | 0.043988 |
| hsa-miR-222-3p    | -0.46555 | 12.96925 | 5.02100 | 0.025042 | 0.044156 |
| hsa-miR-145-3p    | -0.30593 | 4.94783  | 4.99743 | 0.025385 | 0.044546 |
| hsa-miR-23a-5p    | -0.61448 | 3.69357  | 4.96263 | 0.025901 | 0.045233 |
| hsa-miR-16-2-3p   | -0.44021 | 8.22523  | 4.94094 | 0.026228 | 0.045586 |

FC: fold change; CPM: counts per million; LR: likelihood ratio; FDR: *P*-value adjusted by false discovery rate.

**Supplementary Table 4:** The differential expressed miRNAs between complete KD patients and febrile controls.

| <b>Mature.ID</b> | <b>logFC</b> | <b>logCPM</b> | <b>LR</b> | <b>P-value</b> | <b>FDR</b> |
|------------------|--------------|---------------|-----------|----------------|------------|
| hsa-miR-151b     | 5.41786      | 9.74096       | 65.54573  | 5.68E-16       | 1.14E-13   |
| hsa-miR-151a-5p  | 5.09916      | 12.01303      | 65.36105  | 6.24E-16       | 1.14E-13   |
| hsa-miR-4286     | -1.53452     | 4.18276       | 42.48002  | 7.14E-11       | 8.71E-09   |
| hsa-miR-326      | -1.54895     | 4.85537       | 36.57561  | 1.47E-09       | 1.34E-07   |
| hsa-miR-431-3p   | -1.48375     | 3.48802       | 34.85655  | 3.55E-09       | 2.60E-07   |
| hsa-let-7a-3p    | 1.38963      | 5.41956       | 31.85274  | 1.66E-08       | 1.01E-06   |
| hsa-miR-21-3p    | -1.42370     | 4.53780       | 28.78122  | 8.10E-08       | 4.24E-06   |
| hsa-miR-652-3p   | -1.16192     | 9.69751       | 28.00301  | 1.21E-07       | 5.54E-06   |
| hsa-miR-127-5p   | -1.22738     | 5.43177       | 26.17714  | 3.11E-07       | 1.27E-05   |
| hsa-miR-4659b-3p | 1.05871      | 3.59048       | 21.97591  | 2.76E-06       | 0.000101   |
| hsa-miR-26a-5p   | 0.91733      | 16.47581      | 21.42747  | 3.67E-06       | 0.00012    |
| hsa-miR-331-3p   | -0.96712     | 5.17560       | 21.29954  | 3.93E-06       | 0.00012    |
| hsa-miR-143-3p   | -1.12840     | 11.69496      | 20.68700  | 5.41E-06       | 0.000152   |
| hsa-miR-491-5p   | -0.94968     | 2.95932       | 20.22103  | 6.90E-06       | 0.00018    |
| hsa-miR-143-5p   | -1.14092     | 3.59892       | 19.52408  | 9.93E-06       | 0.000242   |
| hsa-miR-374b-3p  | 1.20421      | 4.57127       | 19.35130  | 1.09E-05       | 0.000249   |
| hsa-miR-145-5p   | -1.09265     | 6.12090       | 18.55735  | 1.65E-05       | 0.000355   |
| hsa-miR-345-5p   | -0.89716     | 4.42053       | 17.99617  | 2.21E-05       | 0.00045    |
| hsa-miR-324-5p   | -1.50964     | 4.41418       | 17.33456  | 3.13E-05       | 0.000604   |
| hsa-miR-769-5p   | -0.75304     | 7.60255       | 17.19681  | 3.37E-05       | 0.000617   |
| hsa-miR-410-3p   | -1.08545     | 3.70566       | 16.75253  | 4.26E-05       | 0.000742   |
| hsa-miR-431-5p   | -1.00838     | 3.88638       | 16.14486  | 5.87E-05       | 0.000976   |
| hsa-miR-1307-3p  | -1.10527     | 9.86237       | 15.25897  | 9.37E-05       | 0.001492   |
| hsa-miR-199b-5p  | -1.19304     | 5.71137       | 15.15242  | 9.92E-05       | 0.001512   |
| hsa-miR-223-3p   | -0.89696     | 11.15771      | 14.92824  | 0.000112       | 0.001635   |
| hsa-miR-425-3p   | -0.70400     | 6.50994       | 14.69154  | 0.000127       | 0.001782   |
| hsa-miR-23a-3p   | -0.60447     | 11.58591      | 14.37294  | 0.00015        | 0.001984   |
| hsa-miR-16-2-3p  | 0.92048      | 8.35687       | 14.35002  | 0.000152       | 0.001984   |
| hsa-miR-27a-5p   | -1.23251     | 5.30151       | 13.81573  | 0.000202       | 0.002545   |
| hsa-miR-1-3p     | 1.09891      | 10.61363      | 13.05966  | 0.000302       | 0.003681   |
| hsa-miR-128-3p   | 0.81286      | 10.91580      | 12.70741  | 0.000364       | 0.0043     |
| hsa-miR-28-5p    | 0.64896      | 7.92300       | 12.44708  | 0.000419       | 0.004788   |
| hsa-miR-130b-5p  | 0.95682      | 9.01441       | 11.66179  | 0.000638       | 0.007036   |
| hsa-miR-324-3p   | -1.11716     | 4.02991       | 11.61677  | 0.000654       | 0.007036   |
| hsa-miR-93-3p    | -0.63489     | 3.79617       | 11.45300  | 0.000714       | 0.007464   |
| hsa-miR-181c-3p  | -0.68635     | 3.69364       | 11.31472  | 0.000769       | 0.007818   |
| hsa-miR-2277-5p  | -0.80478     | 2.84762       | 11.11218  | 0.000858       | 0.008484   |
| hsa-miR-22-5p    | 0.58276      | 5.22711       | 10.90040  | 0.000961       | 0.00926    |
| hsa-miR-548am-3p | 0.68555      | 3.65788       | 10.83795  | 0.000994       | 0.009332   |
| hsa-miR-432-5p   | -0.98030     | 7.85717       | 10.77016  | 0.001031       | 0.009335   |
| hsa-let-7a-5p    | 0.53896      | 14.92748      | 10.73525  | 0.001051       | 0.009335   |

---

|                  |          |          |          |          |          |
|------------------|----------|----------|----------|----------|----------|
| hsa-miR-758-3p   | -0.73500 | 4.05479  | 10.70020 | 0.001071 | 0.009335 |
| hsa-miR-379-5p   | -0.78948 | 9.77129  | 10.25927 | 0.00136  | 0.011318 |
| hsa-miR-93-5p    | -0.68962 | 11.31201 | 10.25847 | 0.001361 | 0.011318 |
| hsa-miR-98-5p    | 0.46929  | 10.31376 | 10.16318 | 0.001433 | 0.011644 |
| hsa-miR-132-3p   | -0.76224 | 3.19081  | 10.12408 | 0.001463 | 0.011644 |
| hsa-miR-191-5p   | 0.48336  | 14.29851 | 9.99324  | 0.001571 | 0.012235 |
| hsa-miR-766-3p   | -0.59732 | 6.78379  | 9.93125  | 0.001625 | 0.01239  |
| hsa-miR-4665-5p  | -1.07819 | 3.04068  | 9.80870  | 0.001737 | 0.012973 |
| hsa-miR-589-5p   | -0.61137 | 6.16717  | 9.67130  | 0.001872 | 0.013701 |
| hsa-miR-425-5p   | -0.49314 | 9.06315  | 9.56879  | 0.001979 | 0.014138 |
| hsa-miR-378d     | -0.87095 | 6.57983  | 9.54155  | 0.002009 | 0.014138 |
| hsa-miR-140-3p   | -0.83480 | 13.07057 | 9.39376  | 0.002177 | 0.015035 |
| hsa-miR-128-1-5p | -0.59069 | 2.87728  | 9.28204  | 0.002314 | 0.015627 |
| hsa-miR-877-5p   | -0.64876 | 4.90028  | 9.25520  | 0.002348 | 0.015627 |
| hsa-miR-134-5p   | -0.75328 | 8.52867  | 9.20545  | 0.002413 | 0.01577  |
| hsa-miR-378c     | -0.82033 | 6.82475  | 9.14087  | 0.0025   | 0.01605  |
| hsa-miR-221-3p   | 0.58113  | 13.65369 | 9.07571  | 0.00259  | 0.016345 |
| hsa-miR-1976     | -0.94538 | 2.90666  | 8.74135  | 0.003111 | 0.019297 |
| hsa-let-7d-5p    | 0.55015  | 11.51669 | 8.58275  | 0.003394 | 0.020701 |
| hsa-miR-30b-5p   | -0.75335 | 8.41673  | 8.53755  | 0.003479 | 0.020874 |
| hsa-miR-3173-5p  | 0.70401  | 4.09653  | 8.47578  | 0.003599 | 0.021246 |
| hsa-miR-378g     | -0.57281 | 2.48958  | 8.33643  | 0.003886 | 0.022575 |
| hsa-miR-340-3p   | 0.71757  | 7.24699  | 8.27362  | 0.004023 | 0.023004 |
| hsa-miR-487b-3p  | -0.68013 | 5.30870  | 8.16520  | 0.00427  | 0.024044 |
| hsa-miR-370-3p   | -0.68721 | 9.72945  | 8.04380  | 0.004566 | 0.02532  |
| hsa-let-7g-5p    | 0.50394  | 16.26572 | 8.01565  | 0.004637 | 0.025333 |
| hsa-let-7d-3p    | 0.51767  | 9.54426  | 7.90954  | 0.004917 | 0.026468 |
| hsa-miR-125a-5p  | 0.78010  | 10.30285 | 7.69739  | 0.00553  | 0.029333 |
| hsa-miR-30a-5p   | -0.61457 | 9.78459  | 7.58873  | 0.005873 | 0.03071  |
| hsa-miR-155-5p   | 0.42988  | 8.73239  | 7.54586  | 0.006015 | 0.030746 |
| hsa-miR-140-5p   | -0.57582 | 6.02862  | 7.48448  | 0.006223 | 0.030746 |
| hsa-miR-543      | 0.99527  | 8.28053  | 7.47803  | 0.006246 | 0.030746 |
| hsa-let-7f-5p    | 0.45982  | 16.81021 | 7.47100  | 0.00627  | 0.030746 |
| hsa-miR-941      | -0.61474 | 8.40290  | 7.46231  | 0.0063   | 0.030746 |
| hsa-miR-452-5p   | -0.83472 | 7.18273  | 7.37239  | 0.006623 | 0.031896 |
| hsa-miR-369-3p   | 0.81278  | 5.91235  | 7.27418  | 0.006995 | 0.03325  |
| hsa-miR-24-3p    | -0.42426 | 11.11182 | 6.98075  | 0.008239 | 0.038661 |
| hsa-miR-136-3p   | -0.61404 | 3.98192  | 6.95512  | 0.008358 | 0.038722 |
| hsa-miR-199b-3p  | 0.56175  | 13.05223 | 6.87278  | 0.008752 | 0.039551 |
| hsa-miR-199a-3p  | 0.56174  | 13.05230 | 6.87253  | 0.008753 | 0.039551 |
| hsa-miR-423-3p   | -0.52705 | 12.64971 | 6.83340  | 0.008947 | 0.039932 |
| hsa-miR-376c-3p  | -0.73594 | 3.54705  | 6.81184  | 0.009056 | 0.039932 |
| hsa-miR-26b-5p   | 0.48139  | 13.31265 | 6.73438  | 0.009457 | 0.041206 |
| hsa-miR-493-5p   | 0.63957  | 10.14928 | 6.60615  | 0.010163 | 0.043723 |

---

---

|                  |          |         |         |          |          |
|------------------|----------|---------|---------|----------|----------|
| hsa-miR-629-5p   | -0.51116 | 9.22913 | 6.58429 | 0.010288 | 0.043723 |
| hsa-miR-6842-3p  | -0.54424 | 4.88321 | 6.54706 | 0.010506 | 0.043723 |
| hsa-miR-1255a    | 1.03578  | 3.27272 | 6.54588 | 0.010513 | 0.043723 |
| hsa-miR-424-5p   | -1.04422 | 3.81759 | 6.41639 | 0.011307 | 0.046499 |
| hsa-let-7e-5p    | 0.63258  | 9.83055 | 6.38110 | 0.011534 | 0.046906 |
| hsa-miR-4433b-3p | -0.76904 | 6.65809 | 6.30814 | 0.012018 | 0.048338 |
| hsa-miR-532-5p   | -0.70210 | 9.48120 | 6.25727 | 0.012368 | 0.049205 |

---

FC: fold change; CPM: counts per million; LR: likelihood ratio; FDR: *P*-value adjusted by false discovery rate.

**Supplementary Table 5:** The differential expressed miRNAs between incomplete KD patients and febrile controls.

| <b>Mature.ID</b> | <b>logFC</b> | <b>logCPM</b> | <b>LR</b> | <b>P-value</b> | <b>FDR</b> |
|------------------|--------------|---------------|-----------|----------------|------------|
| hsa-miR-4286     | 1.36043      | 4.43199       | 36.23513  | 1.75E-09       | 6.38E-07   |
| hsa-miR-326      | 1.59583      | 5.12813       | 32.99649  | 9.23E-09       | 1.68E-06   |
| hsa-miR-491-5p   | 1.02384      | 3.10825       | 31.40569  | 2.09E-08       | 2.55E-06   |
| hsa-miR-151a-5p  | -3.19433     | 11.96312      | 27.86317  | 1.30E-07       | 1.19E-05   |
| hsa-miR-1307-3p  | 1.24709      | 9.79283       | 26.93742  | 2.10E-07       | 1.27E-05   |
| hsa-let-7a-3p    | -1.27927     | 5.36491       | 26.86907  | 2.18E-07       | 1.27E-05   |
| hsa-miR-652-3p   | 1.02354      | 9.76925       | 26.64571  | 2.44E-07       | 1.27E-05   |
| hsa-miR-151b     | -3.09663     | 9.69332       | 24.11078  | 9.09E-07       | 3.81E-05   |
| hsa-miR-143-5p   | 1.10703      | 3.66868       | 24.04893  | 9.39E-07       | 3.81E-05   |
| hsa-miR-374b-3p  | -1.18013     | 4.54731       | 22.97809  | 1.64E-06       | 5.46E-05   |
| hsa-miR-941      | 1.16179      | 8.81143       | 22.96972  | 1.65E-06       | 5.46E-05   |
| hsa-miR-331-3p   | 0.89631      | 5.35974       | 21.41887  | 3.69E-06       | 0.000107   |
| hsa-miR-769-5p   | 0.68665      | 7.65041       | 21.36220  | 3.80E-06       | 0.000107   |
| hsa-miR-345-5p   | 0.81589      | 4.49116       | 20.93561  | 4.75E-06       | 0.000124   |
| hsa-miR-143-3p   | 1.00075      | 11.63453      | 20.36507  | 6.40E-06       | 0.000156   |
| hsa-miR-26a-5p   | -0.88063     | 16.44534      | 19.00679  | 1.30E-05       | 0.000297   |
| hsa-miR-589-5p   | 0.72257      | 6.19252       | 18.75160  | 1.49E-05       | 0.000299   |
| hsa-miR-145-5p   | 1.02990      | 6.32218       | 18.72762  | 1.51E-05       | 0.000299   |
| hsa-miR-16-2-3p  | -0.94899     | 8.34682       | 18.66400  | 1.56E-05       | 0.000299   |
| hsa-miR-93-3p    | 0.70277      | 3.92781       | 17.81816  | 2.43E-05       | 0.000444   |
| hsa-miR-28-5p    | -0.69427     | 7.88022       | 17.46657  | 2.92E-05       | 0.000508   |
| hsa-miR-21-3p    | 0.93674      | 4.29721       | 17.22360  | 3.32E-05       | 0.000551   |
| hsa-let-7d-5p    | -0.72524     | 11.44898      | 16.92921  | 3.88E-05       | 0.000616   |
| hsa-miR-877-5p   | 0.80257      | 4.97287       | 16.53811  | 4.77E-05       | 0.000725   |
| hsa-let-7e-5p    | -0.96816     | 9.78404       | 16.38507  | 5.17E-05       | 0.000755   |
| hsa-miR-27a-5p   | 1.37211      | 5.61224       | 16.23500  | 5.60E-05       | 0.000785   |
| hsa-miR-324-5p   | 1.24284      | 4.44334       | 15.98281  | 6.39E-05       | 0.000864   |
| hsa-miR-125a-5p  | -0.98841     | 10.20548      | 15.52909  | 8.12E-05       | 0.001059   |
| hsa-let-7a-5p    | -0.63503     | 14.90424      | 15.36650  | 8.85E-05       | 0.001114   |
| hsa-miR-140-3p   | 0.94471      | 13.22485      | 15.22587  | 9.54E-05       | 0.001161   |
| hsa-miR-98-5p    | -0.56269     | 10.23495      | 14.73350  | 0.000124       | 0.001439   |
| hsa-miR-155-5p   | -0.58231     | 8.73990       | 14.69848  | 0.000126       | 0.001439   |
| hsa-miR-4433b-3p | 1.20239      | 6.80564       | 14.16547  | 0.000167       | 0.001852   |
| hsa-miR-128-3p   | -0.76809     | 10.81782      | 14.08726  | 0.000175       | 0.001874   |
| hsa-miR-4746-5p  | 0.60654      | 3.32032       | 13.85299  | 0.000198       | 0.002022   |
| hsa-miR-2277-5p  | 0.86089      | 3.00160       | 13.76097  | 0.000208       | 0.002022   |
| hsa-miR-22-5p    | -0.60044     | 5.22738       | 13.74402  | 0.000209       | 0.002022   |
| hsa-miR-425-3p   | 0.59181      | 6.56413       | 13.73519  | 0.00021        | 0.002022   |
| hsa-miR-130b-5p  | -0.94892     | 8.91089       | 13.48770  | 0.00024        | 0.002247   |
| hsa-miR-93-5p    | 0.71174      | 11.43057      | 13.30156  | 0.000265       | 0.00242    |
| hsa-miR-324-3p   | 1.03990      | 4.18257       | 13.12118  | 0.000292       | 0.002599   |



---

|                  |          |          |          |          |          |
|------------------|----------|----------|----------|----------|----------|
| hsa-miR-423-3p   | 0.66462  | 12.61174 | 13.03630 | 0.000306 | 0.002655 |
| hsa-miR-493-5p   | -1.00849 | 9.97949  | 12.70577 | 0.000365 | 0.003094 |
| hsa-miR-4659b-3p | -0.80296 | 3.53955  | 12.46702 | 0.000414 | 0.003436 |
| hsa-miR-1976     | 1.03959  | 3.11224  | 12.15782 | 0.000489 | 0.003965 |
| hsa-miR-378d     | 0.90115  | 6.75142  | 12.00116 | 0.000532 | 0.004219 |
| hsa-miR-548am-3p | -0.70543 | 3.60346  | 11.69993 | 0.000625 | 0.004854 |
| hsa-miR-6842-3p  | 0.59327  | 4.83905  | 11.56610 | 0.000672 | 0.005107 |
| hsa-let-7d-3p    | -0.54767 | 9.51581  | 11.21666 | 0.000811 | 0.006039 |
| hsa-miR-378c     | 0.81874  | 7.00258  | 10.81011 | 0.001009 | 0.007369 |
| hsa-miR-532-5p   | 0.86592  | 9.67136  | 10.62481 | 0.001116 | 0.00795  |
| hsa-miR-548l     | -0.57576 | 2.55664  | 10.59723 | 0.001133 | 0.00795  |
| hsa-miR-505-5p   | -0.85474 | 3.17800  | 10.50958 | 0.001188 | 0.008179 |
| hsa-miR-26b-5p   | -0.53115 | 13.29943 | 10.42570 | 0.001243 | 0.0084   |
| hsa-miR-425-5p   | 0.45538  | 9.10277  | 9.94661  | 0.001611 | 0.010694 |
| hsa-miR-330-3p   | -0.71631 | 9.05364  | 9.74586  | 0.001797 | 0.011571 |
| hsa-let-7f-5p    | -0.48630 | 16.79894 | 9.72334  | 0.001819 | 0.011571 |
| hsa-miR-340-3p   | -0.75784 | 7.12256  | 9.68219  | 0.001861 | 0.011571 |
| hsa-miR-181c-3p  | 0.56394  | 3.67831  | 9.65889  | 0.001884 | 0.011571 |
| hsa-miR-431-3p   | 0.86132  | 3.19456  | 9.64170  | 0.001902 | 0.011571 |
| hsa-miR-548o-3p  | -0.45046 | 4.95961  | 9.58250  | 0.001964 | 0.011736 |
| hsa-miR-369-3p   | -1.04055 | 5.70799  | 9.55548  | 0.001994 | 0.011736 |
| hsa-miR-223-3p   | 0.57847  | 11.15404 | 9.49015  | 0.002066 | 0.011968 |
| hsa-miR-199a-3p  | -0.61316 | 13.03965 | 9.41291  | 0.002155 | 0.012103 |
| hsa-miR-199b-3p  | -0.61314 | 13.03959 | 9.41224  | 0.002155 | 0.012103 |
| hsa-miR-543      | -1.06556 | 7.97985  | 9.28344  | 0.002312 | 0.012788 |
| hsa-miR-629-5p   | 0.54957  | 9.25612  | 9.09163  | 0.002568 | 0.013989 |
| hsa-miR-200b-3p  | -0.45554 | 6.17115  | 9.00658  | 0.00269  | 0.014439 |
| hsa-miR-1301-3p  | -0.80939 | 8.97990  | 8.86711  | 0.002904 | 0.015359 |
| hsa-miR-127-5p   | 0.78012  | 5.27400  | 8.61454  | 0.003335 | 0.017389 |
| hsa-miR-185-3p   | 0.47056  | 8.60610  | 8.40207  | 0.003748 | 0.019268 |
| hsa-miR-500a-3p  | 0.49228  | 7.57217  | 8.34403  | 0.00387  | 0.019426 |
| hsa-miR-378g     | 0.50433  | 2.54549  | 8.31958  | 0.003922 | 0.019426 |
| hsa-miR-1226-3p  | -0.68116 | 3.37240  | 8.28838  | 0.00399  | 0.019426 |
| hsa-miR-199b-5p  | 0.68548  | 5.58953  | 8.28759  | 0.003992 | 0.019426 |
| hsa-miR-128-1-5p | 0.47053  | 2.84265  | 8.22624  | 0.004129 | 0.01983  |
| hsa-miR-191-5p   | -0.39360 | 14.29702 | 7.97499  | 0.004743 | 0.022482 |
| hsa-miR-1296-5p  | 0.51939  | 2.64785  | 7.84097  | 0.005108 | 0.023901 |
| hsa-miR-641      | -0.85066 | 5.06671  | 7.75132  | 0.005367 | 0.024798 |
| hsa-miR-30b-5p   | 0.56027  | 8.40320  | 7.47606  | 0.006252 | 0.028319 |
| hsa-miR-210-3p   | 0.58120  | 5.33752  | 7.46689  | 0.006284 | 0.028319 |
| hsa-miR-221-3p   | -0.51005 | 13.66494 | 7.36457  | 0.006652 | 0.029151 |
| hsa-miR-374a-3p  | -0.53379 | 6.45133  | 7.35932  | 0.006672 | 0.029151 |
| hsa-miR-486-3p   | -0.65194 | 7.53671  | 7.34936  | 0.006709 | 0.029151 |
| hsa-miR-766-3p   | 0.55293  | 6.87860  | 7.30211  | 0.006887 | 0.029575 |

---

|                 |          |          |         |          |          |
|-----------------|----------|----------|---------|----------|----------|
| hsa-miR-101-3p  | 0.85697  | 12.53770 | 7.16532 | 0.007433 | 0.031546 |
| hsa-miR-3158-3p | 0.89912  | 5.86407  | 6.94886 | 0.008387 | 0.035188 |
| hsa-miR-132-3p  | 0.52717  | 3.21935  | 6.75308 | 0.009359 | 0.038817 |
| hsa-miR-30b-3p  | -0.54586 | 3.53124  | 6.73107 | 0.009475 | 0.038857 |
| hsa-miR-652-5p  | 0.65491  | 3.92894  | 6.65851 | 0.009868 | 0.039624 |
| hsa-miR-874-3p  | 0.63456  | 2.51147  | 6.65661 | 0.009879 | 0.039624 |
| hsa-miR-10b-5p  | -0.68777 | 5.07207  | 6.55739 | 0.010445 | 0.041439 |
| hsa-miR-106b-3p | 0.66410  | 12.12395 | 6.51837 | 0.010677 | 0.041903 |
| hsa-miR-532-3p  | 0.60707  | 3.90565  | 6.45567 | 0.01106  | 0.042636 |
| hsa-miR-23b-5p  | -0.60545 | 3.87423  | 6.44222 | 0.011144 | 0.042636 |
| hsa-miR-25-5p   | -0.44618 | 3.89131  | 6.43113 | 0.011214 | 0.042636 |
| hsa-miR-7976    | 0.77041  | 3.63232  | 6.40301 | 0.011393 | 0.042869 |
| hsa-miR-99b-3p  | -0.59726 | 6.19274  | 6.36315 | 0.011651 | 0.043396 |

FC: fold change; CPM: counts per million; LR: likelihood ratio; FDR: *P*-value adjusted by false discovery rate.

**Supplementary Table 6:** Stability tests for 16 miRNAs that were validated.

| Rank of stability | NormFinder   |           | Rank of stability | geNorm       |         |
|-------------------|--------------|-----------|-------------------|--------------|---------|
|                   | miRNA        | Stability |                   | miRNA        | M value |
| 1                 | miR-186-5p   | 0.01      | 1                 | miR-24-3p    | 0.751   |
| 2                 | miR-22-3p    | 0.01      | 2                 | miR-126-3p   | 0.762   |
| 3                 | miR-126-3p   | 0.02      | 3                 | miR-26a-5p   | 0.794   |
| 4                 | miR-92a-3p   | 0.02      | 4                 | miR-186-5p   | 0.797   |
| 5                 | miR-199a-3p  | 0.02      | 5                 | miR-151a-3p  | 0.812   |
| 6                 | miR-151a-3p  | 0.03      | 6                 | miR-15a-5p   | 0.871   |
| 7                 | miR-24-3p    | 0.03      | 7                 | miR-27a-3p   | 0.894   |
| 8                 | let-7g-5p    | 0.03      | 8                 | miR-92a-3p   | 0.916   |
| 9                 | miR-27a-3p   | 0.03      | 9                 | miR-30c-5p   | 0.922   |
| 10                | miR-4433b-5p | 0.04      | 10                | miR-22-3p    | 0.934   |
| 11                | miR-26a-5p   | 0.04      | 11                | miR-199a-3p  | 0.959   |
| 12                | miR-125a-5p  | 0.04      | 12                | miR-140-3p   | 1.021   |
| 13                | miR-15a-5p   | 0.04      | 13                | let-7g-5p    | 1.056   |
| 14                | miR-30c-5p   | 0.04      | 14                | miR-125a-5p  | 1.163   |
| 15                | miR-140-3p   | 0.04      | 15                | miR-941      | 1.197   |
| 16                | miR-941      | 0.06      | 16                | miR-4433b-5p | 1.220   |

**Supplementary Table 7: miRNA expression profiles of subjects in training set detected by qRT-PCR.**

| <b>Group</b> | <b>miR-24<br/>-3p</b> | <b>miR-19<br/>9a-3p</b> | <b>miR-15<br/>1a-3p</b> | <b>miR-22<br/>-3p</b> | <b>miR-26<br/>a-5p</b> | <b>miR-27<br/>a-3p</b> | <b>miR-18<br/>6-5p</b> | <b>miR-15<br/>a-5p</b> | <b>let-7g-5<br/>p</b> | <b>miR-30<br/>c-5p</b> | <b>miR-92<br/>a-3p</b> | <b>miR-14<br/>0-3p</b> | <b>miR-12<br/>5a-5p</b> | <b>miR-44<br/>33b-5p</b> | <b>miR-94<br/>1</b> |
|--------------|-----------------------|-------------------------|-------------------------|-----------------------|------------------------|------------------------|------------------------|------------------------|-----------------------|------------------------|------------------------|------------------------|-------------------------|--------------------------|---------------------|
| 0            | 0.92                  | 1.73                    | 3.82                    | 1.82                  | -1.69                  | 0.92                   | 3.24                   | 3.2                    | 1.59                  | 2.72                   | 0.14                   | 4.56                   | 4.71                    | 0.62                     | 9.47                |
| 0            | 1.36                  | 2.07                    | 4.18                    | 2.63                  | -1.32                  | 1.56                   | 3.84                   | 3.89                   | 1.86                  | 2.98                   | 0.63                   | 5.32                   | 4.79                    | 1.47                     | 9.86                |
| 1            | 1.04                  | 1.87                    | 3.76                    | 2.79                  | -0.99                  | 2.4                    | 4.74                   | 4.51                   | 1.58                  | 3.79                   | 0.87                   | 5.13                   | 4.08                    | 2.09                     | 8.66                |
| 0            | 0.63                  | 1.13                    | 3.24                    | 3.93                  | -2.19                  | 3.29                   | 4.86                   | 4.11                   | -1.45                 | 4.81                   | -0.64                  | 3.57                   | 3.58                    | 1.89                     | 8.83                |
| 0            | 0.35                  | 0.04                    | 3.43                    | 2.71                  | -1.69                  | 2.09                   | 4.75                   | 4.1                    | -0.09                 | 3.34                   | -0.36                  | 4.83                   | 5.24                    | 2.63                     | 10.33               |
| 1            | 0.63                  | 0.99                    | 3.93                    | 1.82                  | -1.5                   | 1.31                   | 4.01                   | 3.09                   | 1.7                   | 3.13                   | 0.57                   | 4.68                   | 5.49                    | 0.66                     | 9.21                |
| 0            | 0.65                  | 1.3                     | 4.03                    | 2.26                  | -1.32                  | 2.18                   | 3.99                   | 3.6                    | 0.47                  | 3.6                    | 1.01                   | 3.66                   | 4.41                    | 3.03                     | 9.56                |
| 1            | 0.94                  | 1.29                    | 3.49                    | 2.95                  | -1.43                  | 2.92                   | 3.94                   | 4.46                   | 0.44                  | 4.23                   | -0.13                  | 4.05                   | 4.6                     | 2.81                     | 10.68               |
| 0            | 0.76                  | 1.02                    | 3.82                    | 2.21                  | -1.32                  | 1.98                   | 4.43                   | 3.41                   | -0.44                 | 2.81                   | -1.42                  | 3.23                   | 4.22                    | 2.84                     | 9.01                |
| 0            | 0.06                  | -0.06                   | 3.22                    | 2.68                  | -2.22                  | 1.89                   | 3.6                    | 3.96                   | 0.78                  | 2.7                    | 0.22                   | 5.35                   | 3.83                    | 1.15                     | 9.79                |
| 1            | 0.79                  | 2                       | 4                       | 1.65                  | -1.38                  | 1.73                   | 3.33                   | 3.36                   | 1.56                  | 2.94                   | -0.03                  | 4.31                   | 2.59                    | 1.17                     | 9.56                |
| 0            | 0.54                  | 1.78                    | 3.79                    | 2.31                  | -1.2                   | 1.55                   | 4.11                   | 3.82                   | 0.83                  | 3.34                   | 0.47                   | 4.73                   | 4.71                    | 2.01                     | 9.64                |
| 0            | 0.77                  | 1.4                     | 3.95                    | 3.55                  | -2.14                  | 2.33                   | 4.15                   | 3.98                   | -0.52                 | 3.76                   | -0.44                  | 4.3                    | 4.95                    | 0.93                     | 10.4                |
| 1            | 1.36                  | 2.41                    | 4.35                    | 2.81                  | -0.73                  | 2.53                   | 4.52                   | 4.18                   | 0.78                  | 3.59                   | 0.58                   | 4.18                   | 5.25                    | 1.95                     | 8.61                |
| 0            | 1.07                  | 2.21                    | 3.64                    | 1.86                  | -1.42                  | 1.34                   | 3.6                    | 3.14                   | 0.65                  | 2.76                   | 0.35                   | 3.8                    | 4.82                    | 1.24                     | 10.07               |
| 0            | 0.66                  | 1.35                    | 3.87                    | 2.3                   | -2.01                  | 1.51                   | 3.47                   | 3.29                   | 0.52                  | 2.84                   | 0.13                   | 4.68                   | 2.92                    | 1.17                     | 11.77               |
| 0            | 1.27                  | 1.85                    | 4.63                    | 2.37                  | -1.16                  | 2.16                   | 4.1                    | 3.53                   | 1.14                  | 3.4                    | 1.17                   | 5.65                   | 5.07                    | 1.93                     | 10.82               |
| 1            | 0.18                  | 0.7                     | 3.31                    | 2.68                  | -1.67                  | 2.07                   | 3.89                   | 4.44                   | 0.78                  | 4.16                   | -0.02                  | 4.83                   | 3.96                    | 1.84                     | 9.81                |
| 0            | 1.23                  | 1.35                    | 4.81                    | 2.76                  | -1.26                  | 2.17                   | 4.25                   | 3.61                   | 0.74                  | 3.76                   | 0.82                   | 6.34                   | 5.08                    | 2.41                     | 10.29               |
| 1            | 0.05                  | 1.1                     | 3.08                    | 1.31                  | -1.85                  | 0.98                   | 3.24                   | 3.09                   | 1.15                  | 3.11                   | 0.16                   | 3.84                   | 4.21                    | 1.47                     | 9.23                |
| 0            | 1.33                  | 1.52                    | 3.87                    | 3.36                  | -1.38                  | 2.22                   | 4.39                   | 4.07                   | 0.86                  | 3.76                   | 0.92                   | 4.75                   | 3.75                    | 1.71                     | 9.47                |
| 1            | 0.24                  | 0.69                    | 3.41                    | 2.72                  | -1.33                  | 2.67                   | 3.9                    | 4.43                   | 0.89                  | 4.32                   | 0.4                    | 4.85                   | 3.32                    | 2.41                     | 8.66                |
| 0            | 1.07                  | 1.8                     | 4.11                    | 2.11                  | -1.12                  | 1.67                   | 3.84                   | 3.27                   | 0.65                  | 2.96                   | 0.7                    | 3.86                   | 3                       | 1.43                     | 9.94                |

---

|   |       |       |      |      |       |      |      |      |       |      |       |      |       |       |       |
|---|-------|-------|------|------|-------|------|------|------|-------|------|-------|------|-------|-------|-------|
| 0 | 0.87  | 1.17  | 3.28 | 4.34 | -2.07 | 3.18 | 5.28 | 4.57 | -0.28 | 4.91 | 0.06  | 4.42 | 3.62  | 0.87  | 10.42 |
| 1 | 0.39  | 1.22  | 3.51 | 2.33 | -1.36 | 2.4  | 3.94 | 3.68 | -0.08 | 3.23 | -0.23 | 3.31 | 4.74  | 2.26  | 9.87  |
| 0 | 0.82  | 2.28  | 4.08 | 2.69 | -1.25 | 1.8  | 4.14 | 3.59 | -0.31 | 3.03 | -0.83 | 3.61 | 4.7   | 0.86  | 7.92  |
| 1 | 1.09  | 1.41  | 3.97 | 3.53 | -0.97 | 2.66 | 4.93 | 5.05 | 0.87  | 4.57 | 1.03  | 5.53 | 4.04  | 2.32  | 10.15 |
| 0 | 1.17  | 2.73  | 4.21 | 3.39 | -0.81 | 2.22 | 4.32 | 3.7  | 0.92  | 3.39 | 0.96  | 3.81 | 5.18  | 2.11  | 9.58  |
| 1 | 1.19  | 1.65  | 3.93 | 3.26 | -0.75 | 2.24 | 4.64 | 4.44 | 0.82  | 3.76 | 1.42  | 4.7  | 5.76  | 1.3   | 10.3  |
| 0 | 0.63  | 0.06  | 3.56 | 3.51 | -2.19 | 2.52 | 3.78 | 4.55 | 0.47  | 2.93 | -0.07 | 5.32 | 3.25  | 1.95  | 11.25 |
| 0 | 1.29  | 1.72  | 3.97 | 2.44 | -1.48 | 2.51 | 4.02 | 3.05 | -1.56 | 2.9  | -1.64 | 2.94 | 4.62  | 2.48  | 9.92  |
| 0 | 0.11  | -0.36 | 3.09 | 3.57 | -2.45 | 2.44 | 3.91 | 4.28 | 0.11  | 2.91 | -0.1  | 5.41 | 4.1   | 0.69  | 10.79 |
| 1 | 0.93  | 1.59  | 3.52 | 3.04 | -1.49 | 2.05 | 4.26 | 4.5  | 1.1   | 3.64 | 0.85  | 4.99 | 4.4   | 0.97  | 10.62 |
| 0 | 0.82  | 1.99  | 4.24 | 2.21 | -1.34 | 1.52 | 4.27 | 3.45 | 0.62  | 3.02 | 0.6   | 4.47 | 1.7   | 1.19  | 8.78  |
| 1 | -0.11 | -0.29 | 1.37 | 4.76 | -2.92 | 2.37 | 2.22 | 4.39 | -1.46 | -0.2 | -1.88 | 2.24 | -0.26 | -2.96 | 6.5   |
| 0 | 0.99  | 1.04  | 3.64 | 3.64 | -1.19 | 2.53 | 5.09 | 4.71 | -0.14 | 4.32 | 0.29  | 4.43 | 4.98  | 1.84  | 10.05 |
| 0 | 1.5   | 1.79  | 4.06 | 3.11 | -1.5  | 1.99 | 4.18 | 3.72 | 0.46  | 3.46 | 1.03  | 4.65 | 4.6   | 1.48  | 10.13 |
| 1 | 0.44  | 0.48  | 3.24 | 2.84 | -1.77 | 2.42 | 3.96 | 4.94 | 1.2   | 4.64 | 0.06  | 5.55 | 4.97  | 1.3   | 9.72  |
| 0 | 1.17  | 1.58  | 4.19 | 3.44 | -1.26 | 1.92 | 4.52 | 4.41 | 0.97  | 3.98 | 0.98  | 5.85 | 4.29  | 2.87  | 10.55 |
| 1 | 0.12  | 1.16  | 3.38 | 1.6  | -1.64 | 1.15 | 3.61 | 3.52 | 1.39  | 3.46 | 0.28  | 3.62 | 2.48  | 1.03  | 8.11  |
| 1 | 1.61  | 2.3   | 4.32 | 2.93 | -1.04 | 2.46 | 4.35 | 4.26 | 1.51  | 3.59 | 0.85  | 5.58 | 3.82  | 1.66  | 11.15 |
| 1 | 1.58  | 1.62  | 4.68 | 3.45 | -0.94 | 2.67 | 4.63 | 4.54 | 0.64  | 4.13 | 0.51  | 6.02 | 4.61  | 2.53  | 10.17 |
| 1 | 1.49  | 2.44  | 4.04 | 3.71 | -0.85 | 2.79 | 4.5  | 4.99 | 1.06  | 3.1  | -0.32 | 4.35 | 2.67  | 0.95  | 7.54  |
| 0 | 0.82  | 0.89  | 3.66 | 2.6  | -1.55 | 2.34 | 4.13 | 4.16 | 0.2   | 3.1  | 0.45  | 4.71 | 4.7   | 1.93  | 11.01 |
| 1 | 1.27  | 2.31  | 4.19 | 2.85 | -1.28 | 2.16 | 3.98 | 4.37 | 0.98  | 3.49 | 0.86  | 5.11 | 4.01  | 1.76  | 10.75 |
| 0 | 0.81  | 1.57  | 3.52 | 2.11 | -1.35 | 1.11 | 3.93 | 3.64 | 1.44  | 2.8  | 0.83  | 5.3  | 3.77  | 1.36  | 10.02 |
| 0 | 1.09  | 2.07  | 3.63 | 1.05 | -1.35 | 3.38 | 3.73 | 2.42 | -2.51 | 2.31 | -2.48 | 1.92 | 5.7   | 3.47  | 7.91  |
| 1 | 0.4   | 1.38  | 3.96 | 2.12 | -1.26 | 1.27 | 3.93 | 3.86 | 1.4   | 3.68 | 0.36  | 4.48 | 2.53  | 0.95  | 9.45  |
| 0 | 0.79  | 0.13  | 3.81 | 2.85 | -2.05 | 2.11 | 4.05 | 3.77 | 0.27  | 2.57 | 0.12  | 5.26 | 5.75  | 0.94  | 10.33 |

---

---

|   |      |      |      |      |       |      |      |      |       |      |       |      |      |      |       |
|---|------|------|------|------|-------|------|------|------|-------|------|-------|------|------|------|-------|
| 0 | 1.13 | 2.01 | 4.24 | 1.97 | -1.31 | 1.83 | 3.76 | 3.26 | 1.46  | 2.98 | 0.93  | 5.06 | 3.38 | 1.81 | 9.92  |
| 1 | 1.98 | 2.79 | 4.4  | 2.92 | -0.38 | 3.09 | 4.81 | 4.14 | 0.08  | 3.54 | -0.32 | 4.13 | 5.35 | 3.03 | 9.68  |
| 1 | 2.03 | 4.85 | 5.65 | 1.99 | -0.05 | 3.44 | 3.84 | 3.02 | -1.45 | 2.95 | -0.98 | 2.26 | 6.86 | 6.39 | 6.92  |
| 1 | 1.62 | 2.2  | 4.5  | 3.44 | -1.07 | 2.65 | 4.37 | 4.66 | 1.61  | 3.93 | 1.33  | 5.69 | 3.94 | 0.66 | 10.84 |
| 0 | 0.75 | 1.14 | 3.87 | 2.75 | -1.46 | 1.68 | 4.24 | 3.94 | 0.81  | 3.55 | 0.33  | 5.17 | 3.71 | 0.74 | 9.69  |
| 0 | 0.6  | 0.52 | 3.67 | 3.37 | -2.12 | 2.68 | 4.1  | 4.19 | 0.01  | 4.45 | -0.38 | 4.99 | 3.92 | 3.13 | 10.6  |
| 1 | 0.63 | 1.88 | 3.57 | 2.32 | -1.92 | 1.23 | 3.45 | 3.76 | 1.47  | 3.4  | -0.26 | 4.72 | 3.99 | 0.38 | 10.26 |
| 0 | 0.37 | 1.62 | 3.15 | 1.32 | -1.53 | 0.76 | 3.06 | 3.06 | 1.57  | 2.72 | 0.5   | 3.43 | 4.13 | 1.29 | 9.24  |
| 0 | 0.55 | 1.13 | 3.32 | 1.47 | -1.76 | 0.72 | 3.27 | 2.7  | 0.89  | 2.48 | 0.35  | 4.2  | 4.23 | 0.6  | 10.98 |
| 0 | 0.87 | 1.37 | 3.48 | 3.24 | -1.59 | 2.02 | 6.67 | 4.77 | 1.48  | 4.04 | 1.2   | 5.23 | 3.85 | 2.31 | 9.94  |
| 0 | 1.41 | 1.92 | 4.54 | 2    | -1.28 | 1.56 | 4.07 | 3.84 | 1.77  | 4.06 | 0.32  | 4.5  | 3.14 | 1.21 | 8.62  |
| 1 | 0.85 | 1.5  | 3.45 | 3.01 | -1.2  | 1.99 | 4.43 | 4.86 | 1.3   | 3.74 | 1.29  | 4.95 | 3.84 | 2.28 | 10.87 |
| 0 | 0.87 | 0.36 | 3.74 | 2.66 | -1.76 | 1.97 | 3.68 | 3.82 | 0.73  | 2.69 | 0.31  | 5.79 | 4.65 | 2.3  | 10.63 |
| 0 | 1.32 | 1.9  | 4.58 | 2.25 | -1.4  | 1.66 | 3.96 | 3.25 | -0.19 | 2.88 | -0.7  | 3.67 | 3.45 | 0.99 | 9.01  |
| 1 | 0.77 | 1.78 | 3.61 | 2.7  | -1.87 | 1.77 | 3.95 | 3.88 | -0.08 | 3.16 | 0.02  | 3.8  | 4.56 | 1.54 | 7.52  |
| 1 | 1.12 | 1.89 | 3.69 | 1.95 | -1.43 | 1.38 | 3.67 | 3.43 | 1.28  | 3.05 | 0.71  | 4.11 | 4.52 | 0.95 | 9.28  |
| 0 | 0.52 | 0.02 | 3.74 | 3.52 | -2.34 | 2.56 | 4.3  | 4.05 | -0.3  | 2.73 | -0.25 | 4.98 | 4.22 | 0.49 | 10.13 |
| 1 | 1.17 | 0.97 | 3.69 | 2.9  | -1.63 | 2.36 | 4.12 | 4.49 | 0.9   | 4.24 | -0.18 | 5.89 | 3.58 | 1.11 | 10.62 |
| 1 | 0.8  | 1.4  | 3.67 | 1.67 | -1.81 | 0.88 | 3.27 | 2.85 | 0.44  | 2.35 | -0.34 | 3.62 | 2.48 | 0.54 | 10.5  |
| 1 | 0.99 | 2.09 | 4.11 | 2.76 | -0.6  | 2.2  | 4.62 | 3.93 | 0.09  | 3.2  | -0.11 | 3.31 | 5.02 | 1.76 | 7.27  |
| 1 | 0.3  | 1.29 | 3.41 | 2.76 | -1.08 | 2.69 | 4.24 | 4.26 | 0.64  | 4.16 | -0.63 | 3.75 | 4.27 | 1.58 | 7.69  |
| 1 | 1.02 | 1.35 | 3.9  | 1.77 | -1.59 | 2.45 | 3.64 | 3.17 | -1.08 | 2.26 | -1.08 | 3.47 | 4.93 | 2.93 | 7.88  |
| 0 | 0.68 | 1.38 | 4.48 | 2.65 | -1.42 | 1.83 | 3.82 | 3.75 | 1.08  | 3.35 | 0.73  | 5.49 | 4.03 | 2.18 | 9.6   |
| 1 | 0.77 | 1.05 | 3.12 | 2.34 | -2.19 | 2.27 | 3.07 | 4.08 | 0.94  | 3.86 | -0.75 | 4.62 | 3.17 | 0.04 | 8.62  |
| 1 | 1.6  | 2.33 | 4.25 | 2.43 | -0.72 | 2.63 | 4.56 | 4.02 | 0.42  | 3.47 | 0.19  | 4.01 | 3.81 | 1.5  | 8.88  |
| 1 | 0.56 | 1.23 | 3.29 | 2.66 | -1.5  | 2.28 | 3.59 | 3.95 | 0.34  | 3.8  | -0.57 | 3.97 | 5.11 | 1.72 | 8.61  |

---

|   |      |      |      |      |       |      |      |      |       |      |       |      |      |      |       |
|---|------|------|------|------|-------|------|------|------|-------|------|-------|------|------|------|-------|
| 1 | 1.27 | 1.33 | 4.39 | 3.49 | -1.27 | 2.26 | 4.68 | 4.37 | 0.7   | 3.89 | 0.94  | 5.99 | 4.68 | 1.71 | 11.42 |
| 0 | 1.86 | 2.07 | 4.75 | 3.85 | -0.84 | 2.86 | 4.99 | 4.56 | 0.89  | 4.14 | 1.32  | 5.35 | 4.11 | 2.52 | 10.99 |
| 1 | 1.36 | 1.87 | 4.04 | 2.92 | -0.93 | 2.36 | 4.11 | 4.63 | 1.82  | 3.84 | 0.85  | 5.93 | 3.41 | 2.47 | 10.83 |
| 1 | 1.34 | 2.27 | 4.32 | 3.08 | -0.63 | 2.42 | 4.7  | 4.26 | 1.25  | 3.8  | 0.53  | 5.05 | 4.49 | 1.07 | 9.2   |
| 0 | 1.31 | 2.04 | 4.18 | 2.98 | -0.67 | 2.1  | 4.71 | 4.12 | 1.5   | 2.85 | 1.09  | 4.99 | 5.5  | 1.96 | 9.87  |
| 1 | 1.26 | 1.95 | 4.13 | 2.64 | -1.03 | 2.42 | 4.48 | 3.67 | 0.07  | 3.3  | -0.02 | 4.17 | 4.63 | 0.06 | 10    |
| 0 | 1.58 | 2.28 | 4.15 | 2.94 | -0.95 | 1.68 | 4.71 | 3.58 | 0.62  | 2.67 | 1.31  | 3.64 | 4.12 | 2.84 | 9.63  |
| 0 | 0.34 | 0.15 | 3.56 | 3    | -2.15 | 2.04 | 3.83 | 3.69 | -0.38 | 2.75 | -0.1  | 4.65 | 4.26 | 1.7  | 9.73  |
| 0 | 0.8  | 1.81 | 3.66 | 2.14 | -1.64 | 1.46 | 3.31 | 3.33 | 1.45  | 2.69 | 0.03  | 4.42 | 3.35 | 1.74 | 9.44  |
| 1 | 0.78 | 1.68 | 3.56 | 3.45 | -1.58 | 2.43 | 4.54 | 5.53 | 1.22  | 4.53 | 1.06  | 5.69 | 4.33 | 2.19 | 10.07 |
| 0 | 0.89 | 2.15 | 3.33 | 2.8  | -1.35 | 2.18 | 4.19 | 4.57 | 1.62  | 3.64 | 1.03  | 4.9  | 2.44 | 2.37 | 10.02 |
| 1 | 1.04 | 2.19 | 5    | 1.65 | -1.11 | 1.76 | 4.13 | 2.91 | -0.35 | 2.67 | -0.64 | 3.21 | 2.83 | 3.94 | 9.37  |

The miRNA expression abundances were presented as the value of  $\Delta C_t$  with miR-126. 0 and 1 in the Group column represent febrile control and patient with Kawasaki Disease, respectively.

**Supplementary Table 8: miRNA expression profiles of subjects in testing set detected by qRT-PCR.**

| <b>Group</b> | <b>miR-24<br/>-3p</b> | <b>miR-19<br/>9a-3p</b> | <b>miR-15<br/>1a-3p</b> | <b>miR-22<br/>-3p</b> | <b>miR-26<br/>a-5p</b> | <b>miR-27<br/>a-3p</b> | <b>miR-18<br/>6-5p</b> | <b>miR-15<br/>a-5p</b> | <b>let-7g-5<br/>p</b> | <b>miR-30<br/>c-5p</b> | <b>miR-92<br/>a-3p</b> | <b>miR-14<br/>0-3p</b> | <b>miR-12<br/>5a-5p</b> | <b>miR-44<br/>33b-5p</b> | <b>miR-94<br/>1</b> |
|--------------|-----------------------|-------------------------|-------------------------|-----------------------|------------------------|------------------------|------------------------|------------------------|-----------------------|------------------------|------------------------|------------------------|-------------------------|--------------------------|---------------------|
| 1            | 1.24                  | 2                       | 4.34                    | 3.37                  | -1.11                  | 2.2                    | 4.53                   | 4.19                   | 0.37                  | 3.06                   | -0.22                  | 4.35                   | 3.55                    | 0.81                     | 9.39                |
| 1            | 1.3                   | 1.4                     | 3.92                    | 3.95                  | -1.13                  | 2.63                   | 4.97                   | 4.98                   | 0.72                  | 3.34                   | 0.63                   | 5.93                   | 3.29                    | 0.31                     | 11.26               |
| 1            | 1.7                   | 2.55                    | 3.94                    | 3.48                  | -0.31                  | 3.71                   | 4.38                   | 4.25                   | -1.31                 | 3.55                   | -1.52                  | 3.22                   | 4.3                     | 3.37                     | 8.79                |
| 0            | 1.9                   | 2.02                    | 3.85                    | 3.85                  | -1.35                  | 2.89                   | 4.39                   | 4.44                   | 0.72                  | 2.92                   | 0.14                   | 5.03                   | 4.47                    | 1.01                     | 10.84               |
| 1            | 1.41                  | 1.87                    | 4.09                    | 3.96                  | -1.14                  | 2.45                   | 4.78                   | 5.22                   | 1.5                   | 3.2                    | 0.47                   | 6.05                   | 2.55                    | 0.06                     | 10.63               |
| 1            | 0.79                  | 0.45                    | 3.85                    | 2.29                  | -1.68                  | 1.99                   | 3.44                   | 3.49                   | -1.18                 | 2.6                    | -1.85                  | 3.9                    | 3.67                    | 0.87                     | 8.67                |
| 1            | 0.1                   | 0.04                    | 2.95                    | 2.93                  | -2                     | 2.04                   | 3.08                   | 6.32                   | 1.65                  | 5.43                   | 0.98                   | 4.99                   | 2.7                     | 0.13                     | 9.41                |
| 1            | 0.82                  | 1.36                    | 3.6                     | 2.55                  | -1.68                  | 2.32                   | 3.8                    | 3.52                   | 0.15                  | 2.7                    | -0.19                  | 3.71                   | 4.89                    | 0.88                     | 7.75                |
| 1            | 0.49                  | 0.99                    | 3.17                    | 3                     | -1.67                  | 2.97                   | 3.86                   | 5.05                   | 1.14                  | 4.66                   | -0.19                  | 5.21                   | 2.63                    | 0.71                     | 8.37                |
| 1            | 0.57                  | 1.16                    | 3.41                    | 2.84                  | -1.33                  | 2.64                   | 3.61                   | 4.03                   | 0.58                  | 3.9                    | -0.04                  | 4.44                   | 3.26                    | 3.02                     | 7.64                |
| 1            | 0.5                   | 0.87                    | 3.09                    | 2.71                  | -1.62                  | 2.71                   | 3.47                   | 4.58                   | 1.49                  | 4.26                   | 0.14                   | 5.19                   | 2.65                    | 1.97                     | 8.5                 |
| 1            | 0.41                  | 0.56                    | 3.03                    | 2.58                  | -2.17                  | 2.17                   | 3.06                   | 4.23                   | 1.06                  | 3.72                   | -1.01                  | 4.56                   | 2.52                    | -0.28                    | 9.67                |
| 1            | 0.05                  | 0.41                    | 3.58                    | 2.47                  | -1.72                  | 1.96                   | 4.29                   | 4.11                   | 0.13                  | 3.98                   | -0.19                  | 5.49                   | 2.43                    | 0.63                     | 10.33               |
| 1            | 0.76                  | 1.11                    | 3.17                    | 2.88                  | -1.91                  | 2.17                   | 3.58                   | 4.56                   | 1.39                  | 4.03                   | -0.18                  | 5.62                   | 3.03                    | 0.92                     | 10                  |
| 1            | 0.4                   | 0.64                    | 3.41                    | 2.87                  | -1.9                   | 1.88                   | 3.92                   | 4.56                   | 0.76                  | 4.09                   | -0.1                   | 5.37                   | 2.99                    | 0.57                     | 9.41                |
| 1            | 1.22                  | 2.07                    | 3.63                    | 3.05                  | -0.87                  | 2.46                   | 4.46                   | 4.68                   | 1.75                  | 4.14                   | 1.31                   | 5.58                   | 3.44                    | 2.53                     | 10.93               |
| 1            | 1.62                  | 2.48                    | 3.89                    | 2.85                  | -0.85                  | 2.52                   | 4.52                   | 4.53                   | 1.35                  | 3.62                   | 0.64                   | 4.84                   | 4.59                    | 2.13                     | 9.44                |
| 1            | 1.25                  | 1.8                     | 3.69                    | 3.16                  | -0.79                  | 2.42                   | 4.5                    | 5.1                    | 1.97                  | 4.13                   | 0.91                   | 5.81                   | 4.86                    | 1.74                     | 9.68                |
| 1            | 0.45                  | 0.75                    | 2.13                    | 4.9                   | -3.14                  | 3.34                   | 4.62                   | 5.82                   | -0.2                  | 5.49                   | -1.02                  | 4.98                   | 1.72                    | 0.29                     | 8.62                |
| 1            | 0.97                  | 1.76                    | 3.61                    | 3.55                  | -0.93                  | 2.77                   | 4.76                   | 4.81                   | 1.19                  | 4.42                   | 1.25                   | 4.91                   | 4.46                    | 2.26                     | 9.4                 |
| 1            | 0.98                  | 1.9                     | 4.08                    | 3                     | -0.94                  | 2.5                    | 4.78                   | 4.87                   | 1.77                  | 3.99                   | 1.25                   | 5.23                   | 4.08                    | 2.17                     | 9.64                |
| 1            | 1.53                  | 2.79                    | 4.53                    | 1.35                  | -0.77                  | 1.73                   | 3.67                   | 2.44                   | -0.98                 | 2.16                   | -0.29                  | 2.44                   | 5.34                    | 3.51                     | 7.01                |
| 1            | 1.16                  | 2.05                    | 4.05                    | 2.89                  | -1.01                  | 2.38                   | 4.21                   | 4.49                   | 1.29                  | 3.96                   | 1.02                   | 4.93                   | 4.05                    | 1.78                     | 10.85               |



|   |       |      |      |      |       |      |      |      |       |      |       |      |      |       |       |
|---|-------|------|------|------|-------|------|------|------|-------|------|-------|------|------|-------|-------|
| 1 | 0.8   | 1.31 | 3.77 | 4.28 | -1.92 | 2.67 | 4.49 | 5.16 | 0.11  | 4.67 | 0.06  | 5.51 | 3.4  | 0.81  | 9.21  |
| 1 | 1.19  | 3.53 | 5.41 | 1.78 | -0.3  | 2.46 | 4.65 | 2.83 | -1.33 | 2.83 | -0.87 | 2.08 | 5.02 | 4.72  | 7.63  |
| 1 | 1.66  | 2.38 | 4.63 | 2.82 | -0.87 | 2.49 | 4.86 | 3.28 | -0.02 | 3.08 | 1.34  | 3.23 | 5.01 | 3.93  | 9.36  |
| 1 | 1.48  | 2.06 | 4.05 | 3    | -1.17 | 2.3  | 4.38 | 4.7  | 1.62  | 3.74 | 1.35  | 5.32 | 4.34 | 3.3   | 9.86  |
| 1 | 1.16  | 1.82 | 4.11 | 3.18 | -1.18 | 2.22 | 4.58 | 4.33 | 0.71  | 3.82 | 1.19  | 4.96 | 5.33 | 2.6   | 10.43 |
| 1 | 1.64  | 2.67 | 4.23 | 3.09 | -1.04 | 2.57 | 4.7  | 4.05 | -0.6  | 3.41 | -0.43 | 3.88 | 5.25 | 2.9   | 10.24 |
| 1 | 1.19  | 2    | 3.88 | 3.55 | -1.58 | 2.11 | 4.51 | 4.52 | 0.58  | 4.13 | 0.71  | 5.16 | 4.33 | 1.71  | 11.33 |
| 1 | 0.13  | 1.14 | 3.27 | 1.57 | -1.71 | 1.05 | 3.49 | 3.6  | 1.39  | 3.06 | 0.09  | 4.02 | 2.44 | 1.52  | 8.96  |
| 1 | 0.25  | 1.18 | 3.23 | 1.61 | -1.87 | 0.98 | 3.48 | 3.37 | 1.24  | 3.29 | -0.07 | 4.44 | 2.61 | -0.04 | 8.89  |
| 1 | 0.76  | 1.37 | 4.35 | 1.94 | -0.96 | 1.33 | 4.45 | 3.51 | 0.54  | 3.31 | 1.13  | 4.86 | 3.58 | 1.76  | 10.99 |
| 0 | 1.01  | 1.84 | 3.42 | 2.91 | -1.45 | 1.46 | 4.46 | 4.17 | 1.89  | 3.06 | 1.82  | 5.25 | 4.31 | 3.17  | 10.49 |
| 0 | 0.95  | 1.71 | 3.37 | 2.42 | -1.04 | 1.57 | 4.83 | 3.53 | 0.68  | 3.42 | 0.24  | 3.24 | 2.24 | 0.94  | 8.53  |
| 0 | 0.9   | 1.63 | 3.96 | 2.43 | -1.35 | 1.53 | 4.5  | 3.18 | 0.34  | 2.56 | 0.55  | 4.07 | 2.35 | 1.02  | 9.23  |
| 0 | 1.05  | 1.98 | 4.1  | 2.19 | -0.75 | 1.59 | 5.01 | 3.06 | -0.42 | 2.88 | -0.71 | 2.56 | 2.52 | 2.63  | 8.38  |
| 0 | 1.86  | 2.59 | 4.75 | 3.18 | -0.19 | 2.32 | 4.54 | 3.96 | 1.07  | 2.85 | 0.9   | 4.84 | 4.65 | 2.23  | 9.56  |
| 0 | 1.4   | 1.92 | 4.31 | 3.13 | -0.22 | 2.22 | 4.95 | 4.48 | 2.18  | 3.58 | 1.21  | 5    | 3.98 | 3.69  | 10.33 |
| 0 | 0.27  | 0.74 | 3.22 | 3.14 | -1.56 | 2.4  | 4.37 | 4.65 | 1.03  | 3.18 | 0.33  | 4.91 | 3.05 | 2.55  | 9.57  |
| 1 | 0.1   | 0.29 | 3.25 | 2.54 | -1.91 | 1.63 | 3.61 | 3.97 | 0.77  | 2.93 | 0.03  | 5.01 | 3.46 | 1.76  | 10.32 |
| 0 | 0.54  | 0.59 | 3.98 | 3.09 | -1.79 | 2.16 | 3.97 | 3.37 | -0.55 | 2.48 | -0.82 | 3.83 | 4.97 | 2.03  | 9.03  |
| 0 | -0.23 | -0.5 | 2.96 | 2.82 | -2.65 | 2.92 | 4.07 | 3.31 | -2.38 | 2.49 | -2.38 | 3.06 | 2.43 | 2.43  | 7     |
| 0 | 0.28  | 0.31 | 3.41 | 3.4  | -2.35 | 2.52 | 4.29 | 4.03 | -0.83 | 2.75 | -0.47 | 5.01 | 4.38 | 0.59  | 10.79 |
| 0 | 0.51  | 0.22 | 3.79 | 2.47 | -1.88 | 1.73 | 3.41 | 3.89 | 1.37  | 3.68 | 0.58  | 5.93 | 5.53 | 3.03  | 10.91 |
| 0 | 1.31  | 1.86 | 3.84 | 3.21 | -1.16 | 1.69 | 4.47 | 4.36 | 0.82  | 3.7  | 1.83  | 4.94 | 5.81 | 2.98  | 12.02 |
| 0 | 1.91  | 2.1  | 4.44 | 3.71 | -0.95 | 2.13 | 4.95 | 4.8  | 1.61  | 4.25 | 2.25  | 5.96 | 4.72 | 3.66  | 12.35 |
| 0 | 0.93  | 2.48 | 3.77 | 2.72 | -0.71 | 2.18 | 4.08 | 4.31 | 1.46  | 3.77 | 1.36  | 4.55 | 3.96 | 3.56  | 9.67  |
| 0 | 1.13  | 1.23 | 3.52 | 3.43 | -1.75 | 2.04 | 4.76 | 4.37 | 0.27  | 4.04 | 0.79  | 4.8  | 3.86 | 1.09  | 11.26 |

|   |      |      |      |      |       |      |      |      |       |      |      |      |      |       |       |
|---|------|------|------|------|-------|------|------|------|-------|------|------|------|------|-------|-------|
| 0 | 1.5  | 2.06 | 4.21 | 3.38 | -1.15 | 2.48 | 4.56 | 3.97 | 0.11  | 3.38 | 0.76 | 3.76 | 5.95 | 2.1   | 9.48  |
| 0 | 0.68 | 0.8  | 3.09 | 4.02 | -2.57 | 3.73 | 5.13 | 4.23 | -0.61 | 5.07 | -0.4 | 4.66 | 1.84 | 0.81  | 10.06 |
| 0 | 1.05 | 0.97 | 3.03 | 4.67 | -2.58 | 3.63 | 4.82 | 4.52 | 0.53  | 5.17 | 0.22 | 4.92 | 3.63 | -0.26 | 11.42 |
| 0 | 0.6  | 1.91 | 3.62 | 1.82 | -1.75 | 1.48 | 3.4  | 3.41 | 1.42  | 2.75 | 0.74 | 4.81 | 3.89 | 1.23  | 11.23 |
| 0 | 0.34 | 0.91 | 3.75 | 2.57 | -1.67 | 1.47 | 4    | 3.94 | 0.59  | 3.69 | 0.25 | 5.64 | 3.34 | 1.48  | 10.58 |
| 0 | 1.1  | 1.57 | 4.05 | 2.51 | -1.42 | 1.62 | 4.22 | 3.55 | 0.74  | 3.4  | 0.92 | 5.34 | 4.48 | 1.96  | 11.67 |
| 0 | 0.34 | 0.78 | 3.55 | 3.54 | -2.07 | 1.76 | 4.33 | 3.89 | 0.29  | 4.16 | 0.07 | 5.94 | 4.24 | 1.39  | 10.02 |
| 0 | 1.01 | 1.42 | 4.21 | 2.67 | -1.53 | 1.27 | 3.89 | 3.19 | 0.64  | 2.7  | 0.16 | 5.29 | 4.42 | 0.59  | 11.21 |
| 0 | 0.39 | 1.13 | 3.39 | 2.4  | -1.63 | 1.35 | 3.57 | 3.58 | 1.32  | 3.11 | 0.11 | 4.81 | 4.43 | 1.31  | 9.92  |
| 0 | 1.32 | 2.07 | 4.33 | 2.61 | -1.21 | 1.57 | 3.94 | 3.92 | 1.74  | 3.06 | 0.64 | 5.08 | 3.45 | 1.65  | 9.66  |
| 0 | 0.74 | 2.12 | 4.04 | 2.16 | -1.3  | 1.53 | 3.86 | 3.54 | 1.21  | 2.82 | 0.3  | 4.43 | 3.63 | 2.87  | 10.06 |
| 0 | 1.13 | 1.54 | 3.79 | 2.29 | -1.25 | 1.59 | 4.06 | 3.9  | 1.61  | 3.06 | 0.81 | 5.35 | 3.45 | 2.21  | 10.57 |

The miRNA expression abundances were presented as the value of  $\Delta C_t$  with miR-126. The final diagnostic results of other febrile illnesses and Kawasaki Disease were represent as 0 and 1 in the Group column, respectively.

**Supplementary Table 9:** An error matrix of the actual outcomes against the predicted outcomes.

|        |                 | Predicted       |             |               | Accuracy |
|--------|-----------------|-----------------|-------------|---------------|----------|
|        |                 | Febrile control | Complete KD | Incomplete KD |          |
| Actual | Febrile control | 24              | 3           | 1             | 85.7     |
|        | Complete KD     | 3               | 6           | 6             | 40       |
|        | Incomplete KD   | 9               | 4           | 5             | 27.8     |

**Supplementary Table 10:** Specific primers of validated miRNAs used for qRT-PCR.

| <b>miRNA ID</b>  | <b>Specific primer</b>   |
|------------------|--------------------------|
| hsa-miR-24-3p    | TGGCTCAGTTCAGCAGGAACAG   |
| hsa-miR-199a-3p  | CCACAGTAGTCTGCACATTGGTTA |
| hsa-miR-151a-3p  | CTAGACTGAAGCTCCTTGAGG    |
| hsa-miR-22-3p    | AAGCTGCCAGTTGAAGAACTGT   |
| hsa-miR-26a-5p   | GGTTCAAGTAATCCAGGATAGGCT |
| hsa-miR-126-3p   | CGTACCGTGAGTAATAATGCG    |
| hsa-miR-27a-3p   | TTCACAGTGGCTAAGTTCCGC    |
| hsa-miR-186-5p   | CAAAGAATTCTCCTTTTGGGCT   |
| hsa-miR-140-3p   | TACCACAGGGTAGAACCACGG    |
| hsa-miR-125a-5p  | TCCCTGAGACCCTTTAACCTGTG  |
| hsa-miR-4433b-5p | ATGTCCCACCCCCACTCCTGT    |
| miR-941          | CCGGCTGTGTGCACATGT       |
| hsa-let-7g-5p    | GGGGTGAGGTAGTAGTTTGTACAG |
| hsa-miR-30c-5p   | TGTAAACATCCTACACTCTCAGC  |
| hsa-miR-92a-3p   | TATTGCACTTGTCCCGGCC      |
| hsa-miR-15a-5p   | AGTAGCAGCACATAATGGTTTGTG |
